# Psychopharmacoepidemiological trends in the Portuguese territory during the pandemic and post-pandemic periods (2019–2022)

DAVID BELCHIOR, INESC-ID, Portugal and Instituto Superior Técnico, Portugal

LUÍS MADEIRA\*, Instituto de Medicina Preventiva, FMUL, Portugal and Hospital CUF Descobertas, Portugal

RUI HENRIQUES\*, INESC-ID, Portugal and Instituto Superior Técnico, Portugal

**Abstract.** The increasing prevalence of mental health disorders has been matched with growing psychotropic drug consumption rates around the world. Assessing psychopharmacoepidemiological trends and their determinants is essential to guide medical care delivery and public health policies. However, nation-wide studies on up-to-date consumption patterns are scarce and generally disregard important pharmacological, medical, sociodemographic, and economic covariates. Previous studies on the Portuguese case, a case known for critically high consumption rates of benzodiazepines and antidepressants, are limited to the COVID-19 pre-pandemic period. This study uses the full (electronic) dispensation registry of antidepressants, benzodiazepines and zolpidem, antipsychotics and mood stabilisers in Portugal during the years of 2019 to 2022 with the goal of identifying relevant prescription and consumption patterns prior to, during and after the COVID-19 pandemic. Our findings show a consumption growth trend in antidepressants (7.41% yearly DIDs,  $P = 0.0215$ ) accelerated since 2020, confirmed by the growing number of users (over 15% of the population), overtaking benzodiazepines and zolpidem as the class with most active users. The total annual expenditure has increased 14M€ between 2020 and 2022 (nearly 2M€ in public copayment), notwithstanding price drops in diverse antipsychotic drugs.

**Keywords:** Mental Health, Psychotropic Drugs, Dispensation Trends, Public Health, Psychopharmacology

## 1 INTRODUCTION

Mental health conditions currently rank among the most serious non-communicable diseases by disability-adjusted life years per year [15], with unprecedented prevalence growth trends [8]. In particular, Portugal is the fourth country in the European Union with highest estimated risk of depression in the adult population (with 61% of the population at risk in 2022), and the second country across OECD members with highest estimated consumption of antidepressants [27]. High prescription rates in the Portuguese case are also observed for other psychopharmacological classes, in particular, benzodiazepines. However, there is no comprehensive assessment of the COVID-19 pandemic trends in consumption and expenditures, as well as their underlying covariates.

This study aims at profiling nation-wide psychopharmacoepidemiological trends in the Portuguese territory as a function of relevant covariates, including the geographic location, patient's demographic profile, pharmacological properties, and prescriber's specialty. To this end, we use the complete nation-wide dispensation registry on antidepressants, benzodiazepines and zolpidem, antipsychotics, mood stabilisers and pregabalin on the Portuguese Ministry of Health's Prescrição Eletrónica de Medicamentos (PEM) system from 2019 to 2022. This offers the opportunity to assess pharmacological, medical, demographic and geographic determinants during and after the pandemic period, as a way to guide the design and implementation of public policy actions.

---

\*Co-last authoring

## 2 RELATED WORK

In recent years, a variety of cross-generational retrospective studies on the analysis of psychotropic drug consumption trends have been undertaken. In the case of Portugal, a study dedicated to the pre-pandemic 2016–2019 period [24] revealed an increase of 29.6% and 34.7% in the consumption (in DIDs<sup>1</sup>) of antipsychotics and antidepressants, respectively, with an increase of 37 M€ in expenditures, over 20 M€ of which coming from state-funded copayment. As for the ratio of prescriptions by medical specialty, 64% of psychotropic drug prescriptions were undertaken by general practitioners (GPs), while only 21% were undertaken by neurological and psychiatric specialties. We aim to directly continue this study by extending the analysed data towards the 2020–2022 period, encompassing the effects of the COVID-19 pandemic on the Portuguese society.

Other countries have reported generalised increased consumption of psychotropic drugs during and after the COVID-19 pandemic, namely Croatia [35], France [3, 19], Spain [10] and Brazil [6].

Amongst the varying approaches to quantify drug consumption incidence, the DID is frequently suggested as a reference proxy for incidence [5, 24], providing a uniform, drug-independent perspective on a population's consumption patterns. Notwithstanding its relevance for precise nation-wide assessments, most studies are constrained by observability limitations such as the restriction to subpopulations [20, 34], the reliance on self-reported data [5], or outpatient prescriptions [24, 34].

## 3 METHODS

### Data collection

This work undertakes a nation-wide retrospective study centred on the complete dispensation registry acquired by the PEM platform between 2019/1/1 and 2022/12/31 on psychotropic drugs with Infarmed's approval for commercial use, containing data related to all dispensations of Portuguese citizens aged 18 or older, excluding those who were never dispensed before the moment of data collection. The full list of considered drugs, divided by class and subclass, including their ATC code (if existent) and DDD (defined by route of administration), as well as their various commercialised packages, can be found in the appendix.

The drug categorisation is aligned with ATC classification, with some exceptions. Benzodiazepines and zolpidem are grouped into a single category, regardless of their additional classification as anxiolytics or sedative/hypnotics; this includes the combination of chlordiazepoxide with clonidine bromide, an antispasmodic, with the considered DDD matching chlordiazepoxide's as a standalone drug. Pirlindole has no ATC code as of yet, and thus has an assigned DDD value based on previous studies with the same active ingredient. As valproic acid and lamotrigine (classified as antiepileptics) are also administered as mood stabilisers, they are included in this class. Pregabalin is also analysed, albeit individually.

In order to standardise demographic deviations across the Portuguese territory, data regarding Portugal's administrative divisions (municipalities, districts and NUTS) and their population is retrieved from INE, Portugal's statistics institute [16].

### Data processing

The data warehousing process, necessary for a quick retrieval of dispensation patterns, entails a processing stage, where the raw data is cleaned and harmonised between the different data sources (prescriptions, drugs, packaging, medical specialties, and demographics) before their consolidation. The system developed for the extraction, transformation and loading of the data, as well as its agglomeration into the metrics and the resulting graphs, is divided into three major layers: a

<sup>1</sup> $DID = \frac{DDD \times 1000}{Population \times Days}$ , where a DDD (Defined Daily Dose) is defined by WHO as the average maintenance dose per day for a drug used for its main indication in adults [37].

PostgreSQL relational database management system (RDBMS); a Django back-end responsible for processing the raw data, aggregating it and exposing it with dedicated API endpoints by communicating with the database; a Python front-end for creation of data requests and the conversion of their results into dataframes, which are then plotted using Matplotlib.

The dispensation data includes only 8 age groups, spanning 10 years each, with the exception of the first two (0-17 and 18-29) and last (80 or older) groups; this contrasts with the yearly (estimated) population data retrieved from INE, which is divided in 18 age groups, spanning 5 years each up to the final group, which includes people aged 85 or older, thus requiring modifications to align both sources. First, the 15-19 age group is divided into the 15-17 and the 18-19 groups. Considering yearly birth statistics, this division is made assuming a yearly uniform population distribution, meaning the 18-19 group contains 40% of the initial count (rounded up), which is added to the 20-24 and 25-29 groups, creating the 18-29 group. Second, the 80-84 and 85 or older groups are merged in a single 80+ age group. Finally, the remaining age groups are presented in 10-year segments.

Each individual dispensation act includes the dispensed drug's information, the dispensation's full price and governmental copayment, the prescriber's speciality, a timestamp (year and week), and the patient's (anonymous) ID, age group and gender.

Each dispensation act's location is determined by the pharmacy where it happened or, when unavailable, by the corresponding prescription act's location (e.g., a hospital or healthcare centre).

Data from zolpidem, cariprazine and clozapine only features in the supplied data since 2020, despite their previous approval by Infarmed. In this context, to provide a more statistically accurate estimate on dispensed DIDs and overall costs on their respective classes, the dispensation of these specific drugs is linearly extrapolated for the year of 2019.

Region-specific statistics related to dispensed DIDs are standardised by the national distribution of demographic sections using the  $k$  coefficient,

$$k = \frac{\text{Population}(\text{Region}) \times \text{Population}(\text{Portugal}, \text{AgeGroup}, \text{Gender})}{\text{Population}(\text{Region}, \text{AgeGroup}, \text{Gender}) \times \text{Population}(\text{Portugal})}$$

## 4 RESULTS

The most relevant results can be found in Tables 1–4 and Figures 1–4. Trends were tested at a 5% significance threshold under a two-sided hypothesis on the regression coefficient with a null assumption that the mean year-on-year rate of change is zero, using the Wald test with a  $t$ -distribution of the test statistic.

| Gender       | Age group      | 2019           | 2020           | 2021           | 2022           | Mean change per year, fraction of baseline | $P$                      | Confidence interval      | $r^2$         |
|--------------|----------------|----------------|----------------|----------------|----------------|--------------------------------------------|--------------------------|--------------------------|---------------|
| <b>F</b>     | 18-29          | 0.6370         | 0.7056         | 0.7841         | 0.8145         | 0.0959                                     | 0.0140                   | [0.0466, 0.1452]         | 0.9722        |
|              | 30-39          | 1.8861         | 2.0130         | 1.9954         | 1.9352         | 0.0069                                     | 0.7118                   | [-0.0625, 0.0763]        | 0.0830        |
|              | 40-49          | 5.5923         | 5.9108         | 5.9941         | 5.8082         | 0.0131                                     | 0.4563                   | [-0.0483, 0.0745]        | 0.2956        |
|              | 50-59          | 9.3648         | 9.7367         | 9.9477         | 9.8139         | 0.0166                                     | 0.1942                   | [-0.0206, 0.0538]        | 0.6492        |
|              | 60-69          | 11.6877        | 12.1447        | 12.5675        | 12.5468        | 0.0257                                     | 0.0656                   | [-0.0041, 0.0555]        | 0.8731        |
|              | 70-79          | 11.2125        | 11.4917        | 11.9762        | 12.0590        | 0.0270                                     | 0.0294                   | [0.0067, 0.0473]         | 0.9422        |
|              | 80+            | 9.4550         | 9.5568         | 9.7701         | 9.6668         | 0.0090                                     | 0.1959                   | [-0.0112, 0.0292]        | 0.6466        |
|              | <b>Total</b>   | <b>49.8355</b> | <b>51.5593</b> | <b>53.0351</b> | <b>52.6444</b> | <b>0.0199</b>                              | <b>0.1072</b>            | <b>[-0.0106, 0.0504]</b> | <b>0.7970</b> |
| <b>M</b>     | 18-29          | 0.5263         | 0.5738         | 0.6132         | 0.6442         | 0.0747                                     | 0.0044                   | [0.0534, 0.0960]         | 0.9913        |
|              | 30-39          | 1.3444         | 1.4144         | 1.4260         | 1.3996         | 0.0132                                     | 0.3663                   | [-0.0358, 0.0622]        | 0.4016        |
|              | 40-49          | 3.0552         | 3.1927         | 3.2644         | 3.2277         | 0.0193                                     | 0.1673                   | [-0.0197, 0.0583]        | 0.6935        |
|              | 50-59          | 4.2531         | 4.4622         | 4.6425         | 4.6567         | 0.0327                                     | 0.0499                   | [0.0000, 0.0654]         | 0.9027        |
|              | 60-69          | 5.0707         | 5.2153         | 5.3490         | 5.3999         | 0.0221                                     | 0.0190                   | [0.0088, 0.0354]         | 0.9625        |
|              | 70-79          | 4.7381         | 4.8671         | 5.0427         | 5.0771         | 0.0252                                     | 0.0270                   | [0.0070, 0.0434]         | 0.9468        |
|              | 80+            | 3.0731         | 3.1077         | 3.1548         | 3.1443         | 0.0085                                     | 0.0954                   | [-0.0037, 0.0207]        | 0.8183        |
|              | <b>Total</b>   | <b>22.0608</b> | <b>22.8332</b> | <b>23.4925</b> | <b>23.5496</b> | <b>0.0232</b>                              | <b>0.0493</b>            | <b>[0.0001, 0.0463]</b>  | <b>0.9038</b> |
| <b>Total</b> | <b>71.8963</b> | <b>74.3924</b> | <b>76.5276</b> | <b>76.1940</b> | <b>0.0209</b>  | <b>0.0860</b>                              | <b>[-0.0073, 0.0491]</b> | <b>0.8355</b>            |               |

Table 1. Evolution of dispensed DIDs in benzodiazepines and zolpidem between 2019 and 2022.

| Gender       | Age group    | 2019            | 2020            | 2021            | 2022            | Mean change per year, fraction of baseline | P             | Confidence interval     | r <sup>2</sup>   |
|--------------|--------------|-----------------|-----------------|-----------------|-----------------|--------------------------------------------|---------------|-------------------------|------------------|
| F            | 18-29        | 2.4246          | 2.6526          | 3.4371          | 4.1304          | 0.2434                                     | 0.0209        | [0.0896, 0.3972]        | 0.9587           |
|              | 30-39        | 4.8420          | 4.9132          | 5.4363          | 5.8719          | 0.0746                                     | 0.0347        | [0.0132, 0.1360]        | 0.9318           |
|              | 40-49        | 11.7311         | 11.8981         | 12.9969         | 13.7173         | 0.0602                                     | 0.0311        | [0.0135, 0.1069]        | 0.9388           |
|              | 50-59        | 16.5712         | 16.8355         | 18.2102         | 19.4443         | 0.0603                                     | 0.0300        | [0.0143, 0.1063]        | 0.9410           |
|              | 60-69        | 18.8879         | 19.4357         | 21.1572         | 22.5189         | 0.0668                                     | 0.0173        | [0.0285, 0.1051]        | 0.9656           |
|              | 70-79        | 17.4821         | 17.8966         | 19.5681         | 21.1916         | 0.0732                                     | 0.0264        | [0.0210, 0.1254]        | 0.9479           |
|              | 80+          | 13.2817         | 13.8007         | 14.9794         | 16.0323         | 0.0710                                     | 0.0113        | [0.0383, 0.1037]        | 0.9775           |
|              | <b>Total</b> | <b>85.2206</b>  | <b>87.4324</b>  | <b>95.7853</b>  | <b>102.9067</b> | <b>0.0721</b>                              | <b>0.0224</b> | <b>[0.0249, 0.1193]</b> | <b>0.9557</b>    |
|              | M            | 18-29           | 1.3469          | 1.4517          | 1.7897          | 2.0610                                     | 0.1841        | 0.0181                  | [0.0761, 0.2921] |
| 30-39        |              | 2.0540          | 2.1221          | 2.3601          | 2.6047          | 0.0920                                     | 0.0246        | [0.0287, 0.1553]        | 0.9514           |
| 40-49        |              | 3.8631          | 4.0468          | 4.4655          | 4.7870          | 0.0826                                     | 0.0099        | [0.0469, 0.1183]        | 0.9802           |
| 50-59        |              | 4.5603          | 4.7553          | 5.2963          | 5.7434          | 0.0895                                     | 0.0153        | [0.0414, 0.1376]        | 0.9697           |
| 60-69        |              | 5.5651          | 5.6593          | 6.0555          | 6.5010          | 0.0576                                     | 0.0316        | [0.0125, 0.1027]        | 0.9378           |
| 70-79        |              | 5.7239          | 5.8869          | 6.4159          | 6.9781          | 0.0750                                     | 0.0238        | [0.0244, 0.1256]        | 0.9530           |
| 80+          |              | 4.1153          | 4.2334          | 4.5418          | 4.9208          | 0.0662                                     | 0.0231        | [0.0222, 0.1102]        | 0.9544           |
| <b>Total</b> |              | <b>27.2312</b>  | <b>28.1555</b>  | <b>30.9249</b>  | <b>33.5961</b>  | <b>0.0803</b>                              | <b>0.0193</b> | <b>[0.0316, 0.1290]</b> | <b>0.9617</b>    |
| <b>Total</b> |              | <b>112.4518</b> | <b>115.5879</b> | <b>126.7102</b> | <b>136.5028</b> | <b>0.0741</b>                              | <b>0.0215</b> | <b>[0.0266, 0.1216]</b> | <b>0.9574</b>    |

Table 2. Evolution of dispensed DIDs in antidepressants between 2019 and 2022.

| Gender       | Age group    | 2019           | 2020           | 2021           | 2022           | Mean change per year, fraction of baseline | P             | Confidence interval      | r <sup>2</sup>    |
|--------------|--------------|----------------|----------------|----------------|----------------|--------------------------------------------|---------------|--------------------------|-------------------|
| F            | 18-29        | 0.3225         | 0.3394         | 0.3838         | 0.3958         | 0.0820                                     | 0.0256        | [0.0245, 0.1395]         | 0.9494            |
|              | 30-39        | 0.5329         | 0.5439         | 0.5494         | 0.5278         | -0.0018                                    | 0.8719        | [-0.0451, 0.0415]        | 0.0164            |
|              | 40-49        | 1.1481         | 1.1652         | 1.1667         | 1.1221         | -0.0066                                    | 0.5251        | [-0.0440, 0.0308]        | 0.2255            |
|              | 50-59        | 1.5208         | 1.5618         | 1.6316         | 1.6156         | 0.0233                                     | 0.0999        | [-0.1110, 0.0576]        | 0.8101            |
|              | 60-69        | 1.3898         | 1.4403         | 1.5387         | 1.5850         | 0.0492                                     | 0.0106        | [0.0272, 0.0712]         | 0.9790            |
|              | 70-79        | 1.1307         | 1.1536         | 1.2444         | 1.2900         | 0.0503                                     | 0.0229        | [0.0170, 0.0836]         | 0.9547            |
|              | 80+          | 1.3914         | 1.4137         | 1.5007         | 1.5466         | 0.0397                                     | 0.0222        | [0.0138, 0.0656]         | 0.9562            |
|              | <b>Total</b> | <b>7.4361</b>  | <b>7.6179</b>  | <b>8.0154</b>  | <b>8.0831</b>  | <b>0.0314</b>                              | <b>0.0316</b> | <b>[0.0068, 0.0560]</b>  | <b>0.9378</b>     |
|              | M            | 18-29          | 0.7985         | 0.8240         | 0.8282         | 0.7884                                     | -0.0033       | 0.8255                   | [-0.0597, 0.0531] |
| 30-39        |              | 1.1525         | 1.1534         | 1.1432         | 1.0494         | -0.0277                                    | 0.1812        | [-0.0868, 0.0314]        | 0.6705            |
| 40-49        |              | 1.7280         | 1.7364         | 1.7596         | 1.6506         | -0.0121                                    | 0.4295        | [-0.0650, 0.0408]        | 0.3255            |
| 50-59        |              | 1.6721         | 1.7176         | 1.8162         | 1.7694         | 0.0234                                     | 0.1934        | [-0.0287, 0.0755]        | 0.6506            |
| 60-69        |              | 1.1389         | 1.1587         | 1.2323         | 1.2687         | 0.0407                                     | 0.0218        | [0.0144, 0.0670]         | 0.9568            |
| 70-79        |              | 0.7265         | 0.7219         | 0.7729         | 0.8021         | 0.0382                                     | 0.0684        | [-0.0072, 0.0836]        | 0.8679            |
| 80+          |              | 0.5543         | 0.5518         | 0.5674         | 0.5872         | 0.0206                                     | 0.0892        | [-0.0078, 0.0490]        | 0.8296            |
| <b>Total</b> |              | <b>7.7708</b>  | <b>7.8638</b>  | <b>8.1199</b>  | <b>7.9158</b>  | <b>0.0089</b>                              | <b>0.3955</b> | <b>[-0.0268, 0.0446]</b> | <b>0.3655</b>     |
| <b>Total</b> |              | <b>15.2069</b> | <b>15.4817</b> | <b>16.1352</b> | <b>15.9989</b> | <b>0.0199</b>                              | <b>0.1023</b> | <b>[-0.0098, 0.0496]</b> | <b>0.8059</b>     |

Table 3. Evolution of dispensed DIDs in antipsychotics between 2019 and 2022.

| Gender       | Age group    | 2020          | 2021          | 2022          | Mean change per year, fraction of baseline | P             | Confidence interval      | r <sup>2</sup>    |
|--------------|--------------|---------------|---------------|---------------|--------------------------------------------|---------------|--------------------------|-------------------|
| F            | 18-29        | 0.1456        | 0.1554        | 0.1667        | 0.0724                                     | 0.0254        | [0.0356, 0.1092]         | 0.9984            |
|              | 30-39        | 0.2023        | 0.2035        | 0.2102        | 0.0197                                     | 0.2450        | [-0.0818, 0.1212]        | 0.8591            |
|              | 40-49        | 0.3778        | 0.3718        | 0.3758        | -0.0027                                    | 0.7864        | [-0.0996, 0.0942]        | 0.1084            |
|              | 50-59        | 0.4344        | 0.4525        | 0.4624        | 0.0322                                     | 0.1086        | [-0.0383, 0.1027]        | 0.9712            |
|              | 60-69        | 0.3577        | 0.3710        | 0.3822        | 0.0342                                     | 0.0315        | [0.0127, 0.0557]         | 0.9975            |
|              | 70-79        | 0.1860        | 0.1968        | 0.2064        | 0.0551                                     | 0.0225        | [0.0304, 0.0798]         | 0.9988            |
|              | 80+          | 0.0792        | 0.0787        | 0.0787        | -0.0030                                    | 0.3778        | [-0.0290, 0.0230]        | 0.6872            |
|              | <b>Total</b> | <b>1.7829</b> | <b>1.8297</b> | <b>1.8823</b> | <b>0.0279</b>                              | <b>0.0218</b> | <b>[0.0158, 0.0400]</b>  | <b>0.9988</b>     |
|              | M            | 18-29         | 0.2031        | 0.2129        | 0.2103                                     | 0.0177        | 0.4991                   | [-0.2060, 0.2414] |
| 30-39        |              | 0.2361        | 0.2365        | 0.2322        | -0.0083                                    | 0.3824        | [-0.0809, 0.0643]        | 0.6806            |
| 40-49        |              | 0.3323        | 0.3370        | 0.3337        | 0.0022                                     | 0.8090        | [-0.0871, 0.0915]        | 0.0873            |
| 50-59        |              | 0.3216        | 0.3348        | 0.3390        | 0.0271                                     | 0.1859        | [-0.0762, 0.1304]        | 0.9171            |
| 60-69        |              | 0.2352        | 0.2409        | 0.2468        | 0.0248                                     | 0.0056        | [0.0220, 0.0276]         | 0.9999            |
| 70-79        |              | 0.1373        | 0.1416        | 0.1444        | 0.0258                                     | 0.0820        | [-0.0167, 0.0683]        | 0.9835            |
| 80+          |              | 0.0481        | 0.0491        | 0.0500        | 0.0194                                     | 0.0075        | [0.0165, 0.0223]         | 0.9999            |
| <b>Total</b> |              | <b>1.5136</b> | <b>1.5528</b> | <b>1.5564</b> | <b>0.0141</b>                              | <b>0.2860</b> | <b>[-0.0723, 0.1005]</b> | <b>0.8114</b>     |
| <b>Total</b> |              | <b>3.2965</b> | <b>3.3825</b> | <b>3.4387</b> | <b>0.0216</b>                              | <b>0.0766</b> | <b>[-0.0115, 0.0547]</b> | <b>0.9856</b>     |

Table 4. Evolution of dispensed DIDs in mood stabilisers between 2020 and 2022.

#### 4.1 Benzodiazepines and zolpidem

Both the number of users and the amount of dispensed DIDs in the benzodiazepine class has remained fairly stable – plateauing around the 1.7M users mark, over 15% of the Portuguese population –, with the exception of some moderate, albeit statistically significant, growth trends, mainly driven by the male demographic.

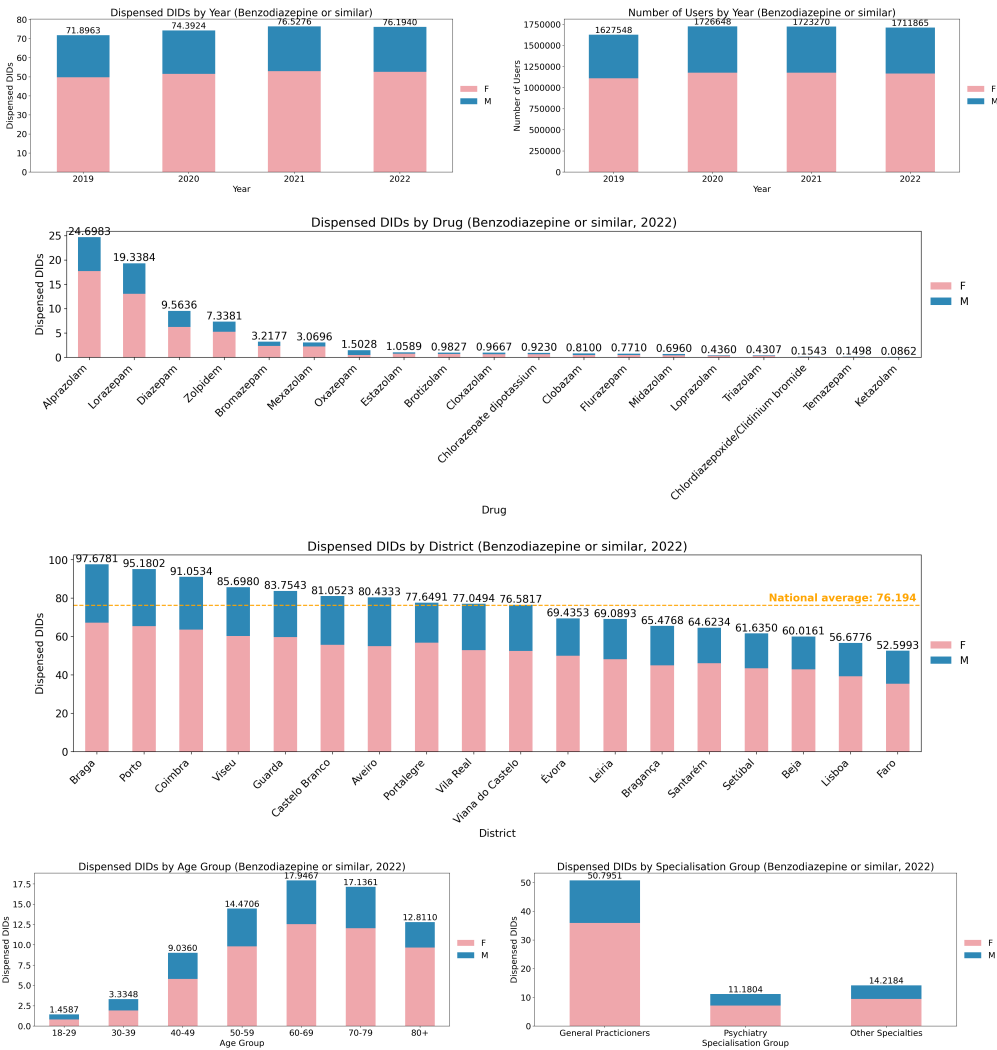

Fig. 1. Benzodiazepine and zolpidem dispensation statistics (DIDs and user count) across districts, demographic sectors and medical specialties (gender is presented using stacked representations).

In particular, the prescription of mexazolam has continued the growth trend shown since 2016, while bromazepam, on the contrary, has faced a relevant decrease. In spite of these facts, the number of dispensed prescriptions of benzodiazepines has rapidly declined in each analysed year.

## 4.2 Antidepressants

Regarding the antidepressant class, the growth trend exhibited since 2016 significantly accelerated in 2021 and 2022, confirming the previously expected impact of the COVID-19 pandemic on the mental health of the Portuguese population, and, as a consequence, the consumption of drugs belonging to this class; as a result, it has replaced the benzodiazepine class as the most consumed psychiatric drug class by number of users, rapidly surpassing the 1.7 M mark. This trend is also

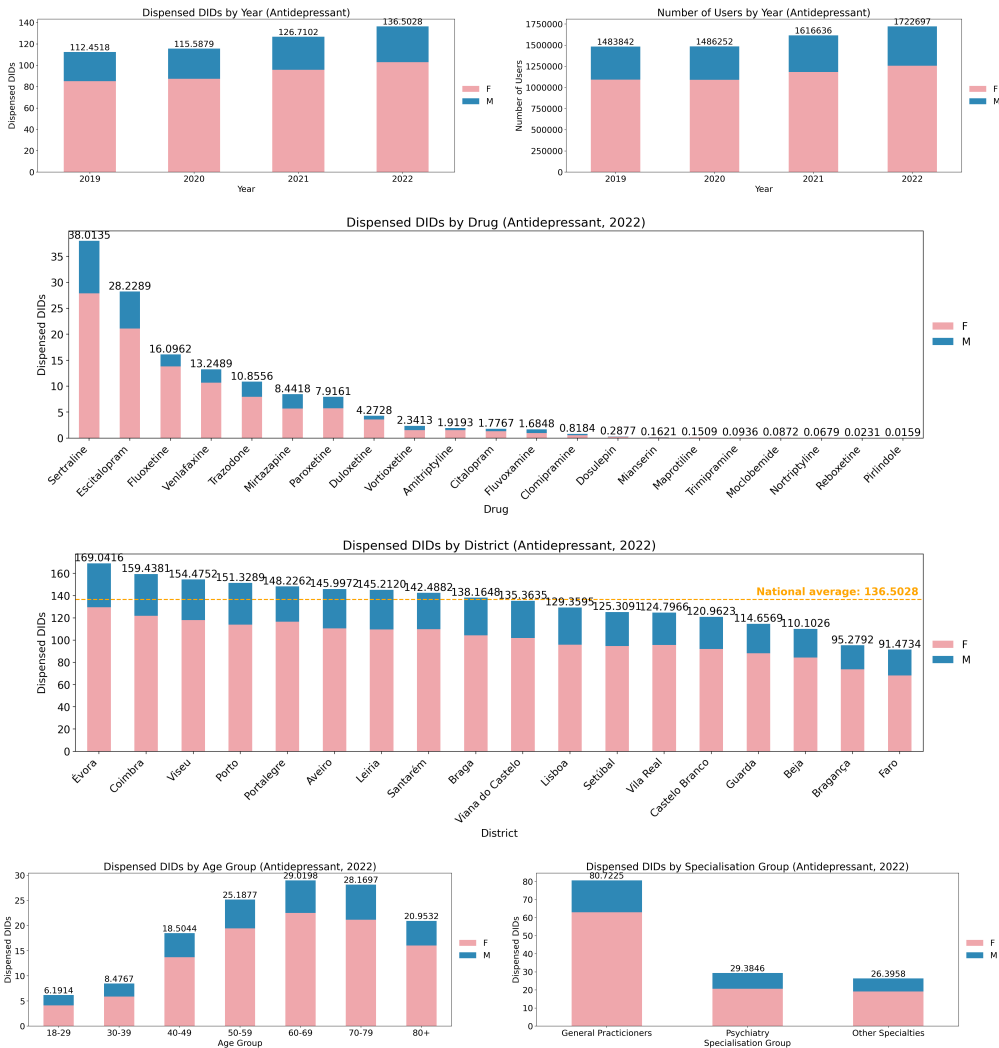

Fig. 2. Antidepressant dispensation statistics (DIDs and user count) across districts, demographic sectors and medical specialties (gender is presented using stacked representations).

reflected in the majority of considered drugs and in all demographic classes, with emphasis on the 18-29 age group, where the average growth relative to the 2019 baseline (calculated from the regression coefficient) is above 15% per year in both males and females.

### 4.3 Antipsychotics

In spite of the statistically significant growth trend, the prescription and consumption of antipsychotics since 2016, fuelled by the majority of the age groups starting at 60 years old, along with the 18-29 age group in females, shows signs of slowing down.

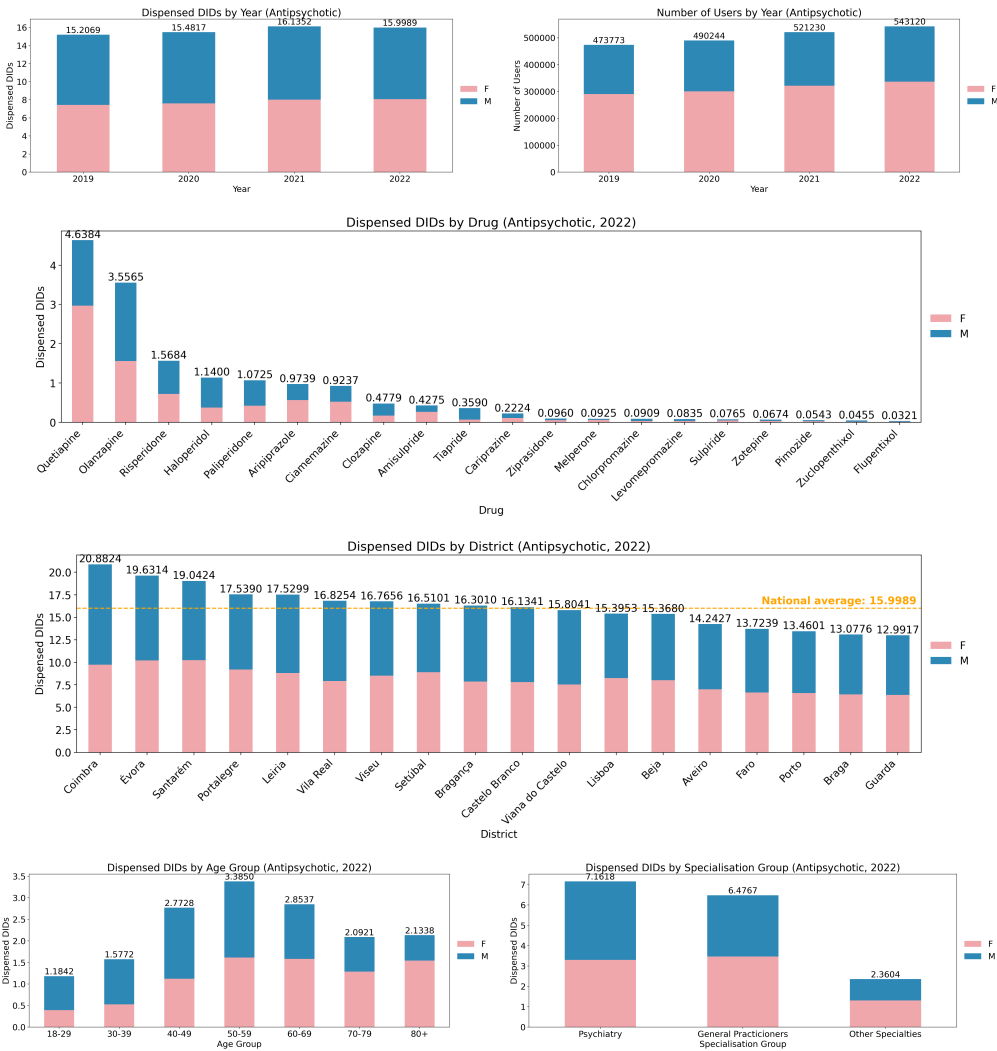

Fig. 3. Antipsychotic dispensation statistics (DIDs and user count) across districts, demographic sectors and medical specialties (gender is presented using stacked representations).

In particular, the number of users of quetiapine, risperidone, olanzapine, aripiprazole and cariprazine has significantly increased, as opposed to the remaining considered drugs, where the trend has remained stable or even decreased.

#### 4.4 Mood stabilisers

Some demographic sections, mostly female, show statistically significant growth trends; however, the overall total falls below the 0.05 significance level. Both the regular price and the state-funded copayment of this drug class were significantly impacted during this period by lithium, as a result of its global price growth registered between 2021 and 2022; with the drop registered in 2023 to prices similar to those in the beginning of 2021, it is expected to be reflected in the near future.

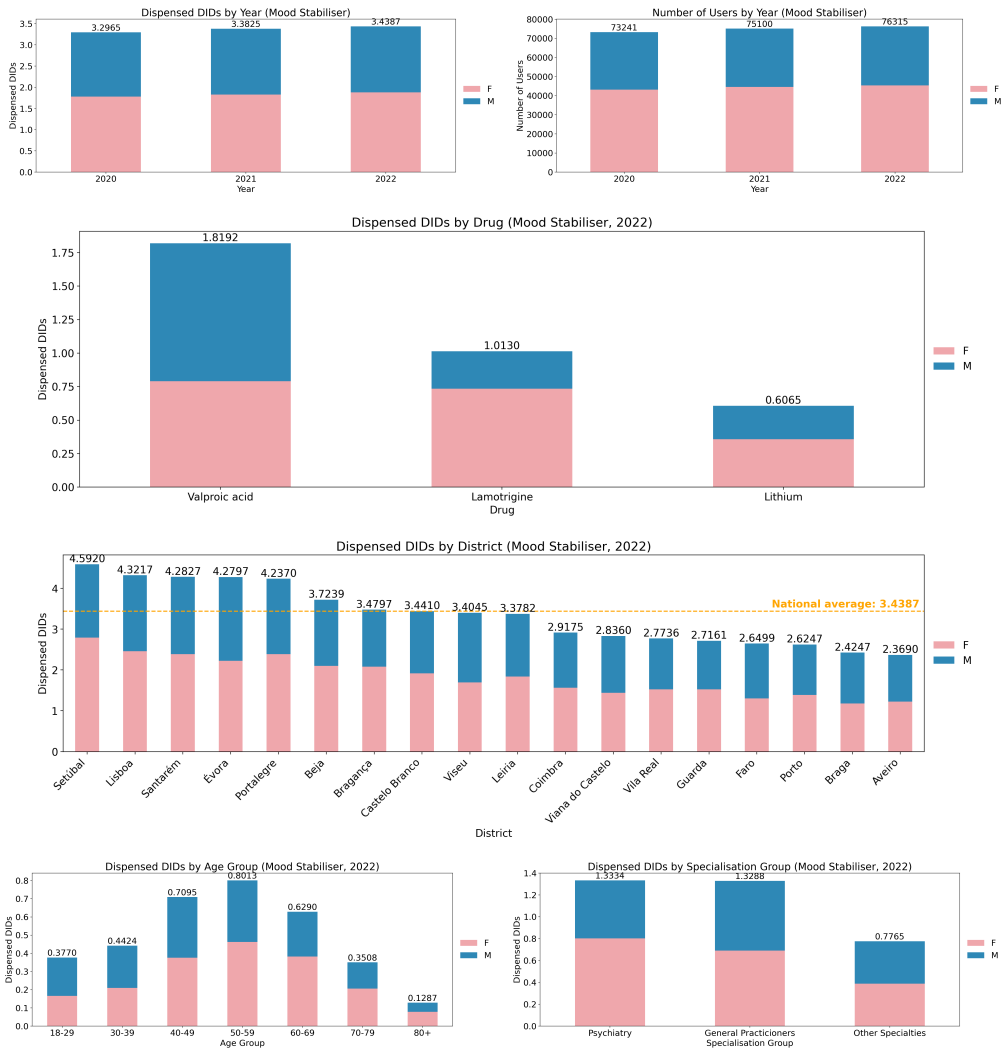

Fig. 4. Mood stabiliser dispensation statistics (DIDs and user count) across districts, demographic sectors and medical specialties (gender is presented using stacked representations).

The consumption metrics of valproic acid and lamotrigine must take in consideration their usage as antiepileptics, which may affect the analysis of this class under a psychiatry-centred lens.



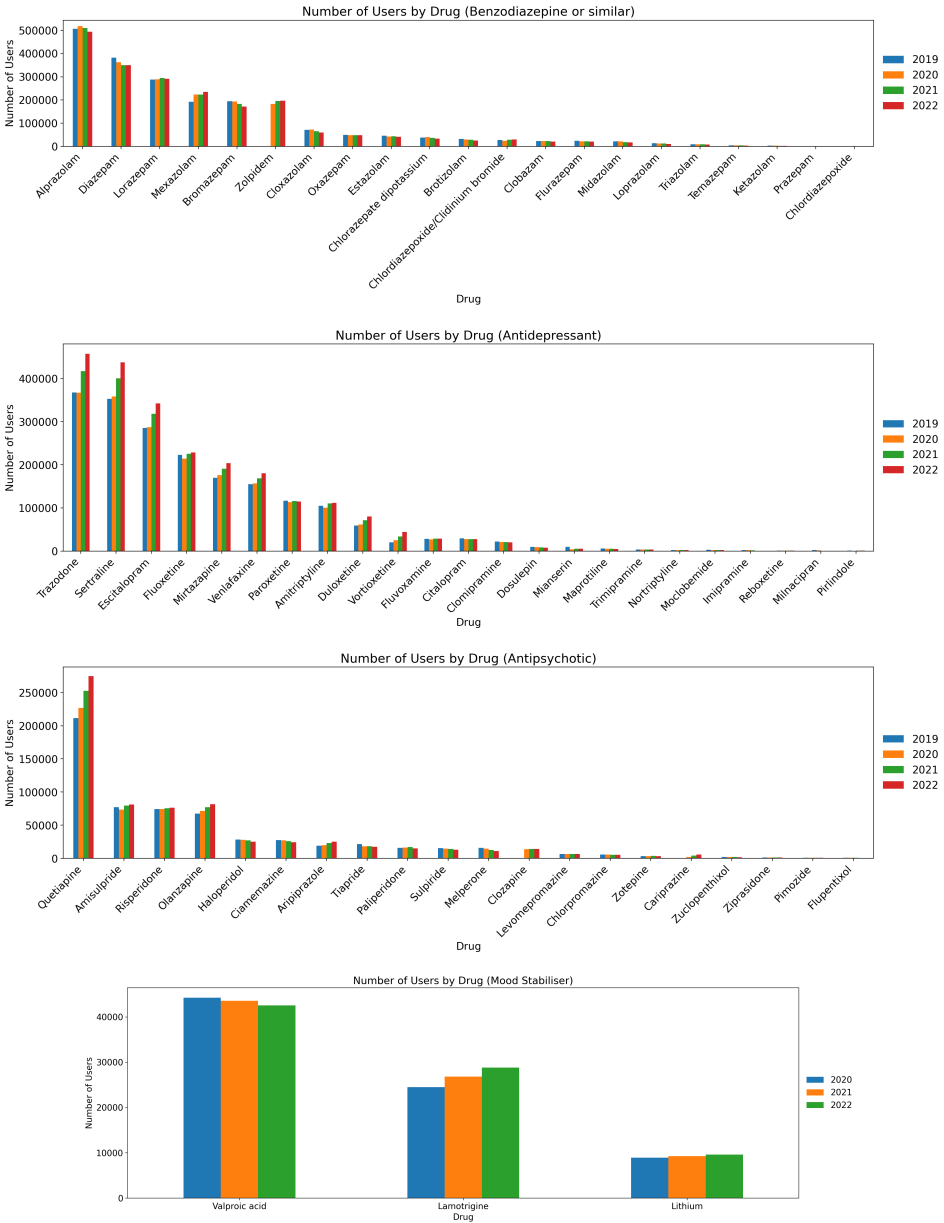

Fig. 5. Number of users with at least one dispensation per psychotropic drug, grouped by their respective class, between 2019 (2020 for mood stabilisers) and 2022.

## 5 DISCUSSION AND FINAL REMARKS

### 5.1 Benzodiazepines and zolpidem

Our results suggest a stable demand and prescription rate for this class of drugs in the general population. The high level of benzodiazepine use (over 15% of the population) raises questions about dependence, potential misuse and the need for careful monitoring [28] and possibly the development of guidelines to manage long-term use. Differences in trends in our specific groups may indicate different levels of stress, changes in lifestyle or increased recognition and treatment of anxiety disorders in these specific demographic groups [23].

Table 1 suggests that significant increases appear to be specific to younger (anxiety and various adjustment reactions) [12] and older age groups (insomnia and behavioural disturbances) [1], suggesting a need for targeted public health interventions. Figure 1 supports several points. First, the consistent pattern of higher benzodiazepine use among women across years, districts and age groups, which seems to reflect differences in health care use. Second, some districts have higher DIDs than the national average, including Coimbra, Porto and Viseu, which supports the need for further research into overuse and development of targeted public health interventions. Third, GPs play a major role in benzodiazepine prescription, highlighting the importance of training and education policies at the primary care for managing mental health conditions [30].

While diazepam continues to play a role far beyond psychiatry, justifying its use, alprazolam, lorazepam and mexazolam together gather for their well-known use in panic attacks, insomnia and generalised anxiety disorder [2, 32]. The increase in the consumption of mexazolam since 2016 appears to be due to changing prescribing habits among healthcare professionals, particularly its very long half-life and safety [9]. The decrease in the number of prescriptions may indicate a shift towards prescribing larger quantities/boxes, which may also be driven by changing guidelines affecting how often benzodiazepines can be prescribed.

In the case of zolpidem, despite the slight increase in its use, it wasn't noticeable or consistent across different age and gender categories. The exception is among men aged 30-39 years, which may indicate underlying issues such as increased stress, anxiety or sleep problems in this particular age group.

### 5.2 Antidepressants

Our results show a marked increase in the use of antidepressants since 2016, further accelerated in 2021 and 2022. This acceleration may be partly driven by to the impact of the COVID-19 pandemic on mental health. They also show that the increased consumption of antidepressants has made them the most prescribed class of psychotropic drugs in Portugal. The fact that they have overtaken benzodiazepines indicates a significant change in mental health treatment patterns in Portugal, possibly reflecting a broader understanding of the role of antidepressants in the treatment of depression and anxiety disorders [7, 17].

While this increase was widespread across all age groups and genders, it particularly affected young adults (18-29 years), who experienced a 15% increase compared to the 2019 baseline, highlighting how young adults may be experiencing stressors that drive adjustment responses, such as isolation, economic insecurity and stress. Table 2 shows that women use more antidepressants than men, which could be due to gender differences in the prevalence of depression [13], health behaviours or prescribing practices. It also shows higher use in older age groups, most likely reflecting the mental health impact of medical comorbidities, isolation or other age-related stressors. Finally, it shows that GPs are at the forefront of prescribing these medications and that there is a need for comprehensive training and advice in primary care.

The present findings may imply an increase in mental health awareness and education (reducing stigma and improving access to care), but also an increase in adjustment reactions or a lack of early access to counselling and therapy alongside pharmacotherapy. Ongoing research is needed to assess the long-term effects of increased use of antidepressants, including studies of their efficacy, safety and outcomes in different demographic groups.

### 5.3 Antipsychotics

The statistically significant increase in prescription and use of antipsychotics since 2016 may suggest increased recognition and treatment of psychotic disorders and bipolar disorder. However, the groups we found with unusual use growth appear to be related to non-psychotic and off-label uses, such as the control of behavioural symptoms in dementia [36] and delirium [21] (e.g. in patients aged 60 and over), or the control of behavioural and anxiety symptoms in women aged 18 to 29. Figure 4 supports that, similarly to the trends in other psychiatric medications, antipsychotics are more commonly prescribed to females and usage increases with age. Quetiapine and olanzapine are among the most dispensed antipsychotics, which may be due to their broad application (quetiapine in anxiety [25] and off-label use for insomnia [18]; olanzapine for behavioural control in emergency departments and delirium [31]).

However, the slow growth suggests that there may be a saturation point or a more conservative use due to concerns about side effects. The reduction in expenditure appears to be due to price reductions (again due to patent expiry, generic entry and renegotiation) of some active substances, namely aripiprazole, paliperidone, risperidone and quetiapine [14].

### 5.4 Mood stabilisers

The use of mood stabilisers has increased over the period of analysis in some demographic groups, suggesting an increase in the recognition or diagnosis of conditions requiring mood stabilisation and associated changes in clinical guidelines [22, 26], or possibly the stress of recent global events such as the COVID-19 pandemic. It cannot be excluded that the use of these drugs in neurology (changes in epilepsy management guidelines) may also be responsible for the increase.

A slight but statistically significant increase in lithium use was reported. This trend is particularly evident among older males (60 years and older) and in most female groups. The increase in older men is paradoxical given that most guidelines suggest that lithium should be avoided after the age of 65 because of its renal complications [29]. However, our results show a steep decline in the use of lithium over the age of 70, together with an increase in antipsychotics, supporting the changes in prescribing patterns in this age group. The increase in lithium in women may be due to increased awareness of good practice in mood stabilisation in women, where the alternative (valproic acid) is known to have teratogenic effects [33].

The large variation in lithium prices due to global price fluctuations could affect the access to this drug and disrupt the management of severe psychiatric conditions; therefore, policy makers and health care providers need to consider mechanisms to buffer against such price volatility.

### 5.5 General trends

Geographically, there is no clear information pointing towards a cross-sectional bias in the consumption of psychiatric drugs at the district level, although districts such as Coimbra and Viseu rank above the national average in consumption-related metrics in the three most consumed classes (antidepressants, antipsychotics and benzodiazepines), while Évora, Beja and Faro consistently rank below it. At a regional level, results indicate a higher consumption in the northern and central districts, in particular in the antidepressant and benzodiazepine classes.

The observed age distributions can be grouped into two main categories: i) antidepressants, benzodiazepines and zolpidem are skewed towards the 60+ groups when compared to the national distribution; in contrast, ii) antipsychotics and mood stabilisers share similar curves that peak in the 50-59 group.

Regarding the prescriber's specialty, the prevalences shown in the 2016–2019 period [24] remain generally true, with antidepressants and benzodiazepines (as well as zolpidem) being majorly prescribed by GPs ( $\geq 60\%$ ), and antipsychotics being prescribed by psychiatrists as the main specialty (44%), closely followed by GPs (40%). Additionally, while lithium is typically prescribed by psychiatrists, other considered mood stabilisers are mostly prescribed by GPs, likely as a result of their alternative use cases.

## ACKNOWLEDGMENTS

Ethical approval was given by the Ethics Committee of CAML (*Centro Académico de Medicina de Lisboa*) with the reference number 340/20. The authors thank *Serviços Partilhados do Ministério da Saúde* (SPMS) for the data provision and valuable support, as well as *Guilherme Queiroz* for his precursor inputs. This work is further supported by national funds through *Fundação para a Ciência e Tecnologia* (FCT) under BII grant 2023/433 (PTDC/CCI-CIF/4613/2020) to D.B. and the INESC-ID pluriannual (UIDB/50021/2020).

## REFERENCES

- [1] Guillaume Airagnes, Antoine Pelissolo, Mélanie Lavallée, Martine Flament, and Frédéric Limosin. 2016. Benzodiazepine misuse in the elderly: risk factors, consequences, and management. *Current psychiatry reports* 18 (2016), 1–9.
- [2] Nassima Ait-Daoud, Allan Scott Hamby, Sana Sharma, and Derek Blevins. 2018. A review of alprazolam use, misuse, and withdrawal. *Journal of addiction medicine* 12, 1 (2018), 4–10.
- [3] Paul Benistand, Philippe Vorilhon, Catherine Laporte, Jean-Baptiste Bouillon-Minois, Georges Brousse, Reza Bagheri, Ukadike Chris Ugbole, Julien S Baker, Valentin Flaudias, Aurélien Mulliez, et al. 2022. Effect of the COVID-19 pandemic on the psychotropic drug consumption. *Frontiers in Psychiatry* 13 (2022), 1020023.
- [4] Matthew L Blommel and Amy L Blommel. 2007. Pregabalin: an antiepileptic agent useful for neuropathic pain. *American Journal of Health-System Pharmacy* 64, 14 (2007), 1475–1482.
- [5] Pilar Carrasco-Garrido, Valentín Hernández-Barrera, Isabel Jiménez-Trujillo, Jesús Esteban-Hernández, Alejandro Álvaro-Meca, Ana López-de Andrés, José Luis DelBarrio-Fernández, and Rodrigo Jiménez-García. 2016. Time trend in psychotropic medication use in Spain: a nationwide population-based study. *International journal of environmental research and public health* 13, 12 (2016), 1177.
- [6] Fernando de Sá Del Fiol, Cristiane de Cássia Bergamaschi, and Silvio Barberato-Filho. 2023. Sales trends of psychotropic drugs in the COVID-19 pandemic: A national database study in Brazil. *Frontiers in Pharmacology* 14 (2023), 1131357.
- [7] Bernardo Dell'Osso, Massimiliano Buoli, David S Baldwin, and A Carlo Altamura. 2010. Serotonin norepinephrine reuptake inhibitors (SNRIs) in anxiety disorders: a comprehensive review of their clinical efficacy. *Human Psychopharmacology: Clinical and Experimental* 25, 1 (2010), 17–29.
- [8] Eurofound. [n. d.]. *Share of adults at risk of depression in 2020-22, Living, working and COVID-19 e-survey*. <https://stat.link/qvcu7m> Accessed: 2023/12/23.
- [9] Hélder Fernandes and Ricardo Moreira. 2014. Mexazolam: clinical efficacy and tolerability in the treatment of anxiety. *Neurology and Therapy* 3 (2014), 1–14.
- [10] María Luisa Nicieza García, Paula Fernández Martínez, Eva Fernández Bretón, Marta M Martínez Alfonso, and Patricio Suárez Gil. 2023. Psychotropic consumption before and during COVID-19 in Asturias, Spain. *BMC Public Health* 23, 1 (2023), 494.
- [11] Khalid Hamandi and Josemir W Sander. 2006. Pregabalin: a new antiepileptic drug for refractory epilepsy. *Seizure* 15, 2 (2006), 73–78.
- [12] HSBC - Health Behaviour in School-aged Children. [n. d.]. *A Saúde dos Adolescentes Portugueses em Contexto de Pandemia – Dados Nacionais 2022*. <https://hbsc.org/portuguese-adolescents-mental-health-and-well-being-decline-hbsc-study-reveals> Accessed: 2024/05/09.
- [13] Janet S Hyde and Amy H Mezulis. 2020. Gender differences in depression: biological, affective, cognitive, and sociocultural factors. *Harvard review of psychiatry* 28, 1 (2020), 4–13.
- [14] INFARMED - Autoridade Nacional do Medicamento e Produtos de Saúde. [n. d.]. *Sistema de Preços de Referência*. <https://www.infarmed.pt/web/infarmed/entidades/medicamentos-uso-humano/avaliacao-tecnologias-saude/>

- avaliacao-terapeutica-e-economica/sistema-de-precos-de-referencia Accessed: 2024/04/15.
- [15] Institute of Health Metrics and Evaluation (IHME). [n. d.]. *Global Health Data Exchange (GHDx)*. <https://vizhub.healthdata.org/gbd-results/> Accessed: 2023/11/20.
- [16] Instituto Nacional de Estatística (INE). [n. d.]. . <https://www.ine.pt> Accessed: 2023/12/21.
- [17] Ewgeni Jakubovski, Jessica A Johnson, Madeeha Nasir, Kirsten Müller-Vahl, and Michael H Bloch. 2019. Systematic review and meta-analysis: Dose–response curve of SSRIs and SNRIs in anxiety disorders. *Depression and anxiety* 36, 3 (2019), 198–212.
- [18] Julie Karsten, Loes A Hagenauw, Jeanine Kamphuis, and Marike Lancel. 2017. Low doses of mirtazapine or quetiapine for transient insomnia: a randomised, double-blind, cross-over, placebo-controlled trial. *Journal of Psychopharmacology* 31, 3 (2017), 327–337.
- [19] Andrew Laurin, Samuel Bulteau, Pascal Caillet, Pascal Artari, Anne Sauvaget, Fanny Gollier-Briant, Jean-François Huon, and Olivier Bonnot. 2023. Psychotropic drugs consumption during 2020 COVID-19 pandemic and lockdowns: Evidence of a surprising resilience of the drugs delivery system in France. *European Neuropsychopharmacology* 73 (2023), 48–61.
- [20] Christine Leong, Kaarina Kowalec, Sherif Eltonsy, James M Bolton, Murray W Enns, Qier Tan, Marina Yogendran, Dan Chateau, Joseph A Delaney, Jitender Sareen, et al. 2022. Psychotropic medication use before and during COVID-19: a population-wide study. *Frontiers in Pharmacology* 13 (2022), 886652.
- [21] Edmund Loneragan, Annette M Britton, and Jay Luxenberg. 2007. Antipsychotics for delirium. *Cochrane database of systematic reviews* 2 (2007).
- [22] Lorenza Lucidi, Mauro Pettorosso, Federica Vellante, Francesco Di Carlo, Franca Ceci, Maria Chiara Santovito, Ilenia Di Muzio, Michele Fornaro, Antonio Ventriglio, Carmine Tomasetti, et al. 2021. Gut microbiota and bipolar disorder: an overview on a novel biomarker for diagnosis and treatment. *International journal of molecular sciences* 22, 7 (2021), 3723.
- [23] Anna Lukačičinová, Daniela Fialová, Nancye May Peel, Ruth Eleanor Hubbard, Jovana Brkic, Graziano Onder, Eva Topinková, Jacob Gindin, Tamar Shochat, Leonard Gray, et al. 2021. The prevalence and prescribing patterns of benzodiazepines and Z-drugs in older nursing home residents in different European countries and Israel: retrospective results from the EU SHELTER study. *BMC geriatrics* 21 (2021), 1–16.
- [24] Luís Madeira, Guilherme Queiroz, and Rui Henriques. 2023. Prepandemic psychotropic drug status in Portugal: a nationwide pharmacoepidemiological profile. *Scientific Reports* 13, 1 (2023), 6912.
- [25] Narong Maneeton, Benchalak Maneeton, Pakapan Woottiluk, Surinporn Likhitsathian, Sirijit Suttajit, Vudhichai Boonyanaruthee, and Manit Srisuranpon. 2016. Quetiapine monotherapy in acute treatment of generalized anxiety disorder: a systematic review and meta-analysis of randomized controlled trials. *Drug design, development and therapy* (2016), 259–276.
- [26] Claire O'Donovan and Martin Alda. 2020. Depression preceding diagnosis of bipolar disorder. *Frontiers in psychiatry* 11 (2020), 537846.
- [27] OECD. 2023. *Consumption of medicines for selected chronic conditions, 2011, 2019 and 2021 (or nearest years)*. <https://doi.org/https://doi.org/10.1787/f11c6179-en>
- [28] Ashish Sarangi, Terry McMahon, and Jayasudha Gude. 2021. Benzodiazepine misuse: an epidemic within a pandemic. *Cureus* 13, 6 (2021).
- [29] Georgios Schoretsanitis, Renato de Filippis, Brian M Brady, Philipp Homan, Trisha Suppes, and John M Kane. 2022. Prevalence of impaired kidney function in patients with long-term lithium treatment: A systematic review and meta-analysis. *Bipolar disorders* 24, 3 (2022), 264–274.
- [30] Mary V Seeman. 2020. Men and women respond differently to antipsychotic drugs. *Neuropharmacology* 163 (2020), 107631.
- [31] Yoanna K Skrobik, Nicolas Bergeron, Marc Dumont, and Stewart B Gottfried. 2004. Olanzapine vs haloperidol: treating delirium in a critical care setting. *Intensive care medicine* 30 (2004), 444–449.
- [32] Michael Soyka, Imane Wild, Bérangeère Caulet, Chrysoula Leontiou, Fabio Lugoboni, and Göran Hajak. 2023. Long-term use of benzodiazepines in chronic insomnia: a European perspective. *Frontiers in psychiatry* 14 (2023), 1212028.
- [33] David Steinbart, Verena Gaus, Alexander B Kowski, and Martin Holtkamp. 2021. Valproic acid use in fertile women with genetic generalized epilepsies. *Acta Neurologica Scandinavica* 144, 3 (2021), 288–295.
- [34] Chris P Stephenson, Emily Karanges, and Iain S McGregor. 2013. Trends in the utilisation of psychotropic medications in Australia from 2000 to 2011. *Australian & New Zealand Journal of Psychiatry* 47, 1 (2013), 74–87.
- [35] Tea Vukičević, Pero Draganić, Marija Škribulja, Livia Puljak, and Svjetlana Došenović. 2023. Consumption of psychotropic drugs in Croatia before and during the COVID-19 pandemic: a 10-year longitudinal study (2012–2021). *Social Psychiatry and Psychiatric Epidemiology* (2023), 1–13.
- [36] RB Wetzels, Sytse U Zuidema, Jos FM de Jonghe, Frans RJ Verhey, and RTCM Koopmans. 2011. Prescribing pattern of psychotropic drugs in nursing home residents with dementia. *International psychogeriatrics* 23, 8 (2011), 1249–1259.

[37] World Health Organization (WHO). [n. d.]. ATC/DDD Index. [https://www.whocc.no/atc\\_ddd\\_index](https://www.whocc.no/atc_ddd_index) Accessed: 2023/12/04.

## A PREGABALIN RESULTS AND DISCUSSION

An increase in the consumption of pregabalin (dispensed DIDs) has been registered by the majority of demographic segments (predominantly female), a trend followed by the number of active users, as Table A.5 and Figure A.6 suggest. The sharp increase in its consumption is most likely driven not only for its anxiolytic properties, but by complementary uses in neurology as an antiepileptic [11] and in neuropathic pain as an analgesic [4]. The important role of GPs in prescribing mood stabilisers highlights the need for primary care providers to be well informed and up to date with mental health practices.

| Gender       | Age group    | 2020   | 2021   | 2022   | Mean change per year, fraction of baseline | P                | Confidence interval | r <sup>2</sup> |
|--------------|--------------|--------|--------|--------|--------------------------------------------|------------------|---------------------|----------------|
| <b>F</b>     | 18-29        | 0.0311 | 0.0358 | 0.0426 | 0.1860                                     | 0.0677           | [-0.0662, 0.4382]   | 0.9887         |
|              | 30-39        | 0.0805 | 0.0910 | 0.0966 | 0.1001                                     | 0.1128           | [-0.1276, 0.3278]   | 0.9689         |
|              | 40-49        | 0.2756 | 0.3040 | 0.3317 | 0.1016                                     | 0.0040           | [0.0934, 0.1098]    | 1.0000         |
|              | 50-59        | 0.5194 | 0.5736 | 0.6225 | 0.0993                                     | 0.0189           | [0.0619, 0.1367]    | 0.9991         |
|              | 60-69        | 0.6721 | 0.7417 | 0.8190 | 0.1092                                     | 0.0191           | [0.0677, 0.1507]    | 0.9991         |
|              | 70-79        | 0.6487 | 0.7256 | 0.8103 | 0.1245                                     | 0.0180           | [0.0797, 0.1693]    | 0.9992         |
|              | 80+          | 0.4656 | 0.5079 | 0.5603 | 0.1018                                     | 0.0390           | [0.0224, 0.1812]    | 0.9962         |
|              | <b>Total</b> | 2.6931 | 2.9796 | 3.2830 | 0.1095                                     | 0.0105           | [0.0866, 0.1324]    | 0.9997         |
| <b>M</b>     | 18-29        | 0.0228 | 0.0239 | 0.0303 | 0.1653                                     | 0.2438           | [-0.6808, 1.0114]   | 0.8603         |
|              | 30-39        | 0.0576 | 0.0631 | 0.0695 | 0.1035                                     | 0.0236           | [0.0548, 0.1522]    | 0.9986         |
|              | 40-49        | 0.1335 | 0.1504 | 0.1593 | 0.0968                                     | 0.1123           | [-0.1225, 0.3161]   | 0.9692         |
|              | 50-59        | 0.2140 | 0.2391 | 0.2654 | 0.1200                                     | 0.0090           | [0.0984, 0.1416]    | 0.9998         |
|              | 60-69        | 0.3031 | 0.3366 | 0.3665 | 0.1046                                     | 0.0207           | [0.0614, 0.1478]    | 0.9989         |
|              | 70-79        | 0.3088 | 0.3349 | 0.3723 | 0.1027                                     | 0.0657           | [-0.0325, 0.2379]   | 0.9894         |
|              | 80+          | 0.1879 | 0.2067 | 0.2281 | 0.1070                                     | 0.0238           | [0.0562, 0.1578]    | 0.9986         |
|              | <b>Total</b> | 1.2277 | 1.3547 | 1.4914 | 0.1074                                     | 0.0135           | [0.0783, 0.1365]    | 0.9995         |
| <b>Total</b> | 3.9208       | 4.3343 | 4.7744 | 0.1089 | 0.0114                                     | [0.0840, 0.1338] | 0.9997              |                |

Table 5. Evolution of the dispensed DID in pregabalin between 2020 and 2022.

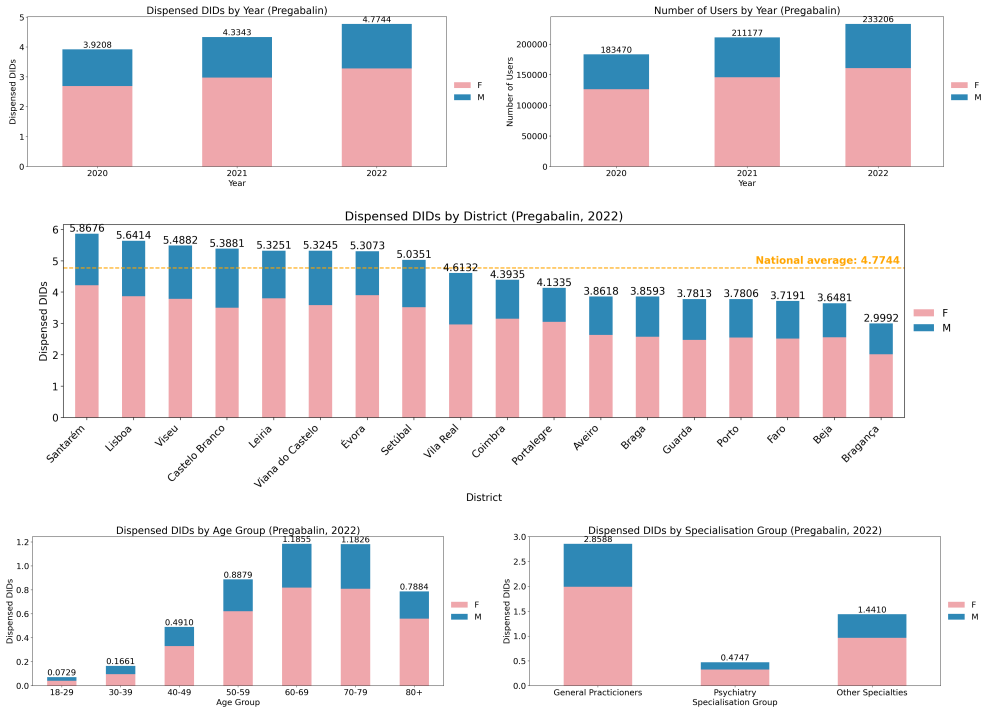

Fig. 6. Pregabalin dispensation statistics (DIDs and user count) across districts, demographic sectors and medical specialties (gender is presented using stacked representations).

## B SUPPLEMENTARY RESULTS

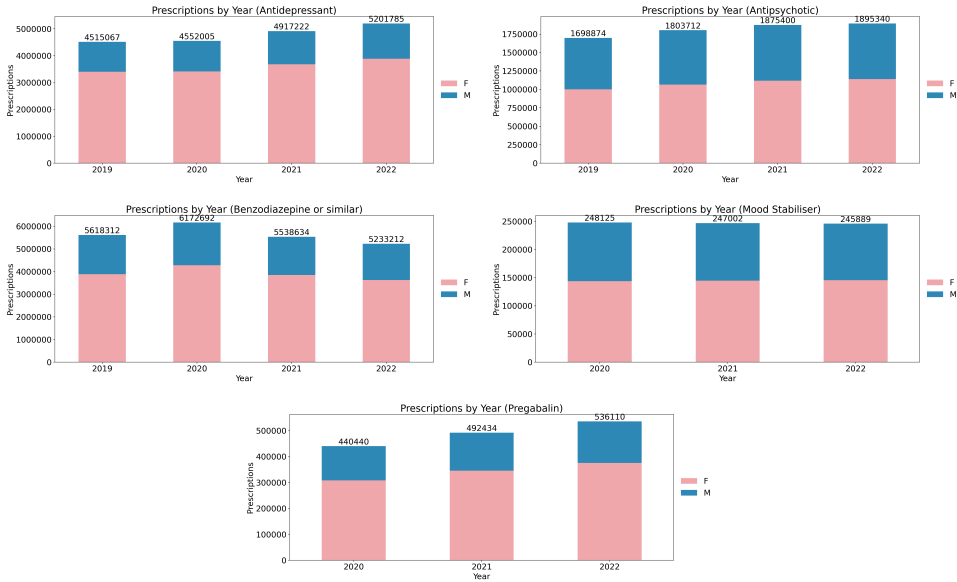

Fig. 7. Evolution of the number of prescriptions with at least one dispensation act of each considered psychotropic drug class between 2019 (or 2020, if unavailable) and 2022.

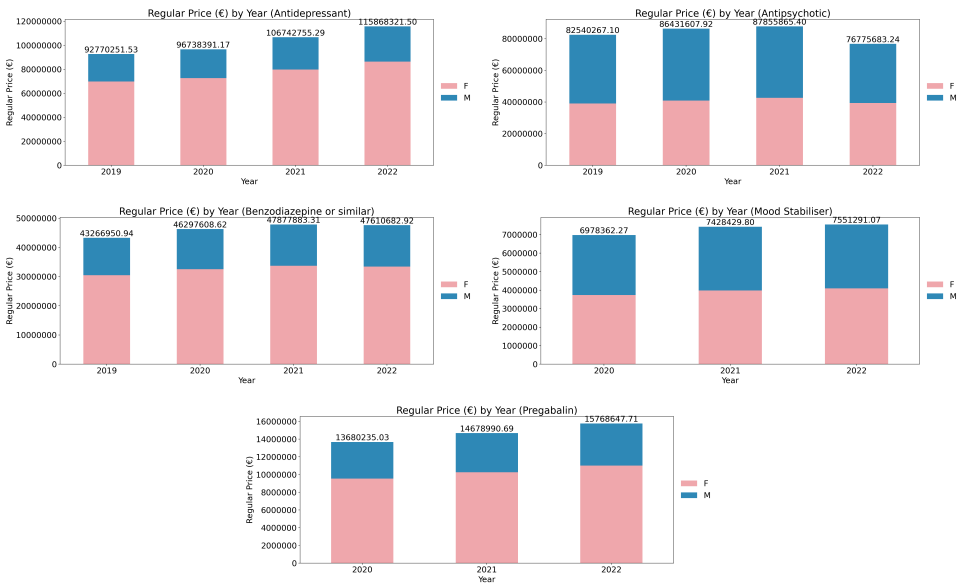

Fig. 8. Evolution of the total expenditure of each considered psychotropic drug class between 2019 (or 2020, if unavailable) and 2022.



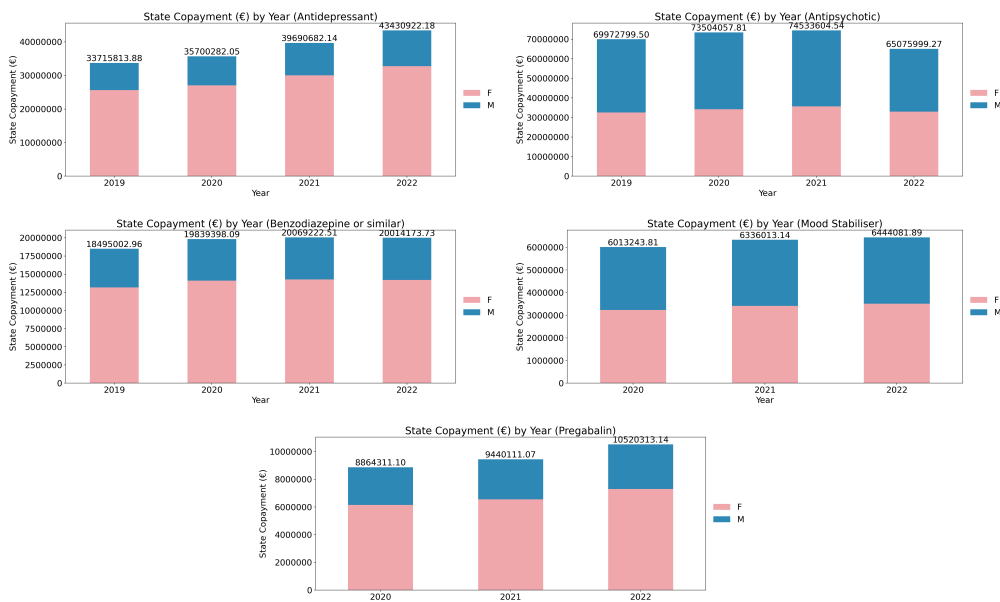

Fig. 9. Evolution of the total state-funded copayment of each considered psychotropic drug class between 2019 (or 2020, if unavailable) and 2022.

### C LIST OF AVAILABLE DRUG PACKAGES

| Drug class     | Drug name     | ATC code | DDD                | Mode                     | Package type         | Dosage/unit | Total dosage (g) | DDD/package |
|----------------|---------------|----------|--------------------|--------------------------|----------------------|-------------|------------------|-------------|
| Antidepressant | Amitriptyline | N06AA09  | 75 mg              | Coated tablet            | Blister 10 units     | 10 mg       | 0.1000           | 1.333       |
|                | Amitriptyline | N06AA09  | 75 mg              | Coated tablet            | Blister 20 units     | 10 mg       | 0.2000           | 2.667       |
|                | Amitriptyline | N06AA09  | 75 mg              | Coated tablet            | Blister 60 units     | 10 mg       | 0.6000           | 8.000       |
|                | Amitriptyline | N06AA09  | 75 mg              | Coated tablet            | Blister 60 units     | 25 mg       | 1.5000           | 20.000      |
|                | Amitriptyline | N06AA09  | 75 mg              | Coated tablet            | Blister 60 units     | 75 mg       | 4.5000           | 60.000      |
|                | Citalopram    | N06AB04  | 20 mg              | Film-coated tablet       | Blister 10 units     | 10 mg       | 0.1000           | 5.000       |
|                | Citalopram    | N06AB04  | 20 mg              | Film-coated tablet       | Blister 14 units     | 10 mg       | 0.1400           | 7.000       |
|                | Citalopram    | N06AB04  | 20 mg              | Film-coated tablet       | Blister 14 units     | 20 mg       | 0.2800           | 14.000      |
|                | Citalopram    | N06AB04  | 20 mg              | Film-coated tablet       | Blister 40 units     | 40 mg       | 1.1200           | 56.000      |
|                | Citalopram    | N06AB04  | 20 mg              | Film-coated tablet       | Blister 30 units     | 40 mg       | 1.2000           | 60.000      |
|                | Citalopram    | N06AB04  | 20 mg              | Film-coated tablet       | Blister 56 units     | 10 mg       | 0.5600           | 28.000      |
|                | Citalopram    | N06AB04  | 20 mg              | Film-coated tablet       | Blister 56 units     | 20 mg       | 1.1200           | 56.000      |
|                | Citalopram    | N06AB04  | 20 mg              | Film-coated tablet       | Blister 60 units     | 10 mg       | 0.6000           | 30.000      |
|                | Citalopram    | N06AB04  | 20 mg              | Film-coated tablet       | Blister 60 units     | 20 mg       | 1.2000           | 60.000      |
|                | Citalopram    | N06AA04  | 100 mg             | Extended-release tablet  | Blister 60 units     | 75 mg       | 4.5000           | 45.000      |
|                | Clomipramine  | N06AA04  | 100 mg             | Coated tablet            | Blister 10 units     | 10 mg       | 0.1000           | 1.000       |
|                | Clomipramine  | N06AA04  | 100 mg             | Coated tablet            | Blister 60 units     | 10 mg       | 0.6000           | 6.000       |
|                | Clomipramine  | N06AA04  | 100 mg             | Coated tablet            | Blister 20 units     | 25 mg       | 1.5000           | 15.000      |
|                | Clomipramine  | N06AA04  | 100 mg             | Injectable solution      | Ampoule 5 units 2 ml | 25 mg/2 ml  | 1.2500           | 1.250       |
|                | Dosulepin     | N06AA16  | 150 mg             | Coated tablet            | Blister 20 units     | 75 mg       | 1.5000           | 10.000      |
|                | Dosulepin     | N06AA16  | 150 mg             | Coated tablet            | Blister 60 units     | 75 mg       | 4.5000           | 30.000      |
|                | Duloxetine    | N06AX21  | 60 mg              | Gastro-resistant capsule | Blister 28 units     | 120 mg      | 3.3600           | 56.000      |
|                | Duloxetine    | N06AX21  | 60 mg              | Gastro-resistant capsule | Blister 28 units     | 30 mg       | 0.8400           | 14.000      |
|                | Duloxetine    | N06AX21  | 60 mg              | Gastro-resistant capsule | Blister 28 units     | 60 mg       | 1.6800           | 28.000      |
|                | Duloxetine    | N06AX21  | 60 mg              | Gastro-resistant capsule | Blister 28 units     | 90 mg       | 2.5200           | 42.000      |
|                | Duloxetine    | N06AX21  | 60 mg              | Gastro-resistant capsule | Blister 7 units      | 30 mg       | 0.2100           | 3.500       |
|                | Escitalopram  | N06AB10  | 10 mg              | Orodispersible tablet    | Blister 56 units     | 10 mg       | 0.5600           | 56.000      |
|                | Escitalopram  | N06AB10  | 10 mg              | Orodispersible tablet    | Blister 56 units     | 20 mg       | 1.1200           | 112.000     |
|                | Escitalopram  | N06AB10  | 10 mg              | Film-coated tablet       | Blister 14 units     | 10 mg       | 0.1400           | 14.000      |
|                | Escitalopram  | N06AB10  | 10 mg              | Film-coated tablet       | Blister 20 units     | 10 mg       | 0.2000           | 20.000      |
|                | Escitalopram  | N06AB10  | 10 mg              | Film-coated tablet       | Blister 56 units     | 10 mg       | 0.5600           | 56.000      |
|                | Escitalopram  | N06AB10  | 10 mg              | Film-coated tablet       | Blister 56 units     | 20 mg       | 1.1200           | 112.000     |
|                | Escitalopram  | N06AB10  | 10 mg              | Film-coated tablet       | Blister 60 units     | 10 mg       | 0.6000           | 60.000      |
|                | Escitalopram  | N06AB10  | 10 mg              | Film-coated tablet       | Blister 60 units     | 20 mg       | 1.2000           | 120.000     |
|                | Escitalopram  | N06AB10  | 10 mg              | Oral drops               | Dropper 1 unit 15 ml | 20 mg/ml    | 0.3000           | 30.000      |
|                | Fluoxetine    | N06AB03  | 20 mg              | Capsule                  | Blister 10 units     | 20 mg       | 0.2000           | 10.000      |
|                | Fluoxetine    | N06AB03  | 20 mg              | Capsule                  | Blister 14 units     | 20 mg       | 0.2800           | 14.000      |
|                | Fluoxetine    | N06AB03  | 20 mg              | Capsule                  | Blister 20 units     | 20 mg       | 0.4000           | 20.000      |
|                | Fluoxetine    | N06AB03  | 20 mg              | Capsule                  | Blister 28 units     | 20 mg       | 0.5600           | 28.000      |
|                | Fluoxetine    | N06AB03  | 20 mg              | Capsule                  | Blister 50 units     | 20 mg       | 1.0000           | 50.000      |
| Fluoxetine     | N06AB03       | 20 mg    | Capsule            | Blister 56 units         | 20 mg                | 1.1200      | 56.000           |             |
| Fluoxetine     | N06AB03       | 20 mg    | Capsule            | Blister 60 units         | 20 mg                | 1.2000      | 60.000           |             |
| Fluoxetine     | N06AB03       | 20 mg    | Oral solution      | Bottle 1 unit 140 ml     | 4 mg/ml              | 0.5600      | 28.000           |             |
| Fluvoxamine    | N06AB08       | 100 mg   | Film-coated tablet | Blister 10 units         | 50 mg                | 0.5000      | 5.000            |             |
| Fluvoxamine    | N06AB08       | 100 mg   | Film-coated tablet | Blister 20 units         | 50 mg                | 1.0000      | 10.000           |             |
| Fluvoxamine    | N06AB08       | 100 mg   | Film-coated tablet | Blister 60 units         | 100 mg               | 6.0000      | 60.000           |             |
| Fluvoxamine    | N06AB08       | 100 mg   | Film-coated tablet | Blister 60 units         | 50 mg                | 3.0000      | 30.000           |             |
| Imipramine     | N06AA02       | 100 mg   | Coated tablet      | Blister 60 units         | 10 mg                | 0.6000      | 6.000            |             |
| Imipramine     | N06AA02       | 100 mg   | Coated tablet      | Blister 60 units         | 25 mg                | 1.5000      | 15.000           |             |
| Maprotiline    | N06AA21       | 100 mg   | Coated tablet      | Blister 60 units         | 25 mg                | 1.5000      | 15.000           |             |

| Drug class     | Drug name     | ATC code | DDD                       | Mode                  | Package type         | Dosage/unit | Total dosage (g) | DDD/package |
|----------------|---------------|----------|---------------------------|-----------------------|----------------------|-------------|------------------|-------------|
| Antidepressant | Maprotiline   | N06AA21  | 100 mg                    | Coated tablet         | Blister 10 units     | 25 mg       | 0.2500           | 2.500       |
|                | Maprotiline   | N06AA21  | 100 mg                    | Coated tablet         | Blister 60 units     | 50 mg       | 3.0000           | 30.000      |
|                | Maprotiline   | N06AA21  | 100 mg                    | Coated tablet         | Blister 60 units     | 75 mg       | 4.5000           | 45.000      |
|                | Maprotiline   | N06AA21  | 100 mg                    | Film-coated tablet    | Blister 60 units     | 25 mg       | 1.5000           | 15.000      |
|                | Maprotiline   | N06AA21  | 100 mg                    | Film-coated tablet    | Blister 60 units     | 50 mg       | 3.0000           | 30.000      |
|                | Maprotiline   | N06AA21  | 100 mg                    | Film-coated tablet    | Blister 60 units     | 75 mg       | 4.5000           | 45.000      |
|                | Mianserin     | N06AX03  | 60 mg                     | Coated tablet         | Blister 10 units     | 30 mg       | 0.3000           | 5.000       |
|                | Mianserin     | N06AX03  | 60 mg                     | Coated tablet         | Blister 60 units     | 30 mg       | 1.8000           | 30.000      |
|                | Milnacipran   | N06AX17  | 100 mg                    | Capsule               | Blister 56 units     | 25 mg       | 1.4000           | 14.000      |
|                | Milnacipran   | N06AX17  | 100 mg                    | Capsule               | Blister 56 units     | 50 mg       | 2.8000           | 28.000      |
|                | Mirtazapine   | N06AX11  | 30 mg                     | Orodispersible tablet | Blister 18 units     | 15 mg       | 0.2700           | 9.000       |
|                | Mirtazapine   | N06AX11  | 30 mg                     | Orodispersible tablet | Blister 20 units     | 15 mg       | 0.3000           | 10.000      |
|                | Mirtazapine   | N06AX11  | 30 mg                     | Orodispersible tablet | Blister 20 units     | 30 mg       | 0.6000           | 20.000      |
|                | Mirtazapine   | N06AX11  | 30 mg                     | Orodispersible tablet | Blister 30 units     | 15 mg       | 0.4500           | 15.000      |
|                | Mirtazapine   | N06AX11  | 30 mg                     | Orodispersible tablet | Blister 30 units     | 30 mg       | 0.9000           | 30.000      |
|                | Mirtazapine   | N06AX11  | 30 mg                     | Orodispersible tablet | Blister 30 units     | 45 mg       | 1.3500           | 45.000      |
|                | Mirtazapine   | N06AX11  | 30 mg                     | Orodispersible tablet | Blister 60 units     | 15 mg       | 0.9000           | 30.000      |
|                | Mirtazapine   | N06AX11  | 30 mg                     | Orodispersible tablet | Blister 60 units     | 30 mg       | 1.8000           | 60.000      |
|                | Mirtazapine   | N06AX11  | 30 mg                     | Orodispersible tablet | Blister 6 units      | 15 mg       | 0.0900           | 3.000       |
|                | Mirtazapine   | N06AX11  | 30 mg                     | Orodispersible tablet | Therm. tape 30 units | 15 mg       | 0.4500           | 15.000      |
|                | Mirtazapine   | N06AX11  | 30 mg                     | Orodispersible tablet | Therm. tape 30 units | 30 mg       | 0.9000           | 30.000      |
|                | Mirtazapine   | N06AX11  | 30 mg                     | Orodispersible tablet | Therm. tape 6 units  | 15 mg       | 0.0900           | 3.000       |
|                | Mirtazapine   | N06AX11  | 30 mg                     | Coated tablet         | Blister 30 units     | 30 mg       | 0.9000           | 30.000      |
|                | Mirtazapine   | N06AX11  | 30 mg                     | Coated tablet         | Blister 14 units     | 15 mg       | 0.2100           | 7.000       |
|                | Mirtazapine   | N06AX11  | 30 mg                     | Coated tablet         | Blister 30 units     | 30 mg       | 0.9000           | 30.000      |
|                | Mirtazapine   | N06AX11  | 30 mg                     | Coated tablet         | Blister 56 units     | 15 mg       | 0.8400           | 28.000      |
|                | Mirtazapine   | N06AX11  | 30 mg                     | Coated tablet         | Blister 56 units     | 30 mg       | 1.6800           | 56.000      |
|                | Mirtazapine   | N06AX11  | 30 mg                     | Film-coated tablet    | Blister 10 units     | 15 mg       | 0.1500           | 5.000       |
|                | Mirtazapine   | N06AX11  | 30 mg                     | Film-coated tablet    | Blister 30 units     | 30 mg       | 0.9000           | 30.000      |
|                | Mirtazapine   | N06AX11  | 30 mg                     | Film-coated tablet    | Blister 14 units     | 15 mg       | 0.2100           | 7.000       |
|                | Mirtazapine   | N06AX11  | 30 mg                     | Film-coated tablet    | Blister 14 units     | 30 mg       | 0.4200           | 14.000      |
|                | Mirtazapine   | N06AX11  | 30 mg                     | Film-coated tablet    | Blister 15 units     | 15 mg       | 0.2250           | 7.500       |
|                | Mirtazapine   | N06AX11  | 30 mg                     | Film-coated tablet    | Blister 15 units     | 30 mg       | 0.4500           | 15.000      |
|                | Mirtazapine   | N06AX11  | 30 mg                     | Film-coated tablet    | Blister 20 units     | 15 mg       | 0.3000           | 10.000      |
|                | Mirtazapine   | N06AX11  | 30 mg                     | Film-coated tablet    | Blister 30 units     | 30 mg       | 0.9000           | 30.000      |
|                | Mirtazapine   | N06AX11  | 30 mg                     | Film-coated tablet    | Blister 28 units     | 15 mg       | 0.4200           | 14.000      |
|                | Mirtazapine   | N06AX11  | 30 mg                     | Film-coated tablet    | Blister 28 units     | 30 mg       | 0.8400           | 28.000      |
|                | Mirtazapine   | N06AX11  | 30 mg                     | Film-coated tablet    | Blister 30 units     | 15 mg       | 0.4500           | 15.000      |
|                | Mirtazapine   | N06AX11  | 30 mg                     | Film-coated tablet    | Blister 30 units     | 30 mg       | 0.9000           | 30.000      |
|                | Mirtazapine   | N06AX11  | 30 mg                     | Film-coated tablet    | Blister 56 units     | 15 mg       | 0.8400           | 28.000      |
|                | Mirtazapine   | N06AX11  | 30 mg                     | Film-coated tablet    | Blister 56 units     | 30 mg       | 1.6800           | 56.000      |
|                | Mirtazapine   | N06AX11  | 30 mg                     | Film-coated tablet    | Blister 60 units     | 15 mg       | 0.9000           | 30.000      |
|                | Mirtazapine   | N06AX11  | 30 mg                     | Film-coated tablet    | Blister 60 units     | 30 mg       | 1.8000           | 60.000      |
|                | Moclobemide   | N06AG02  | 300 mg                    | Film-coated tablet    | Blister 10 units     | 150 mg      | 1.5000           | 5.000       |
|                | Moclobemide   | N06AG02  | 300 mg                    | Film-coated tablet    | Blister 20 units     | 150 mg      | 3.0000           | 10.000      |
|                | Moclobemide   | N06AG02  | 300 mg                    | Film-coated tablet    | Blister 60 units     | 300 mg      | 9.0000           | 30.000      |
|                | Moclobemide   | N06AG02  | 300 mg                    | Film-coated tablet    | Blister 60 units     | 600 mg      | 18.0000          | 60.000      |
|                | Nortriptyline | N06AA10  | 75 mg                     | Coated tablet         | Blister 20 units     | 25 mg       | 0.5000           | 6.667       |
|                | Nortriptyline | N06AA10  | 75 mg                     | Coated tablet         | Blister 60 units     | 25 mg       | 1.5000           | 20.000      |
|                | Paroxetine    | N06AB05  | 20 mg                     | Tablet                | Blister 10 units     | 20 mg       | 0.2000           | 10.000      |
|                | Paroxetine    | N06AB05  | 20 mg                     | Tablet                | Blister 20 units     | 20 mg       | 0.4000           | 20.000      |
|                | Paroxetine    | N06AB05  | 20 mg                     | Tablet                | Blister 60 units     | 1.2000      | 6.0000           | 60.000      |
|                | Paroxetine    | N06AB05  | 20 mg                     | Film-coated tablet    | Blister 10 units     | 20 mg       | 0.2000           | 10.000      |
|                | Paroxetine    | N06AB05  | 20 mg                     | Film-coated tablet    | Blister 20 units     | 20 mg       | 0.4000           | 20.000      |
|                | Paroxetine    | N06AB05  | 20 mg                     | Film-coated tablet    | Blister 30 units     | 20 mg       | 0.6000           | 30.000      |
|                | Paroxetine    | N06AB05  | 20 mg                     | Film-coated tablet    | Blister 60 units     | 20 mg       | 1.2000           | 60.000      |
|                | Paroxetine    | N06AB05  | 20 mg                     | Film-coated tablet    | Bottle 10 units      | 20 mg       | 0.2000           | 10.000      |
|                | Paroxetine    | N06AB05  | 20 mg                     | Film-coated tablet    | Bottle 30 units      | 20 mg       | 0.6000           | 30.000      |
| Paroxetine     | N06AB05       | 20 mg    | Film-coated tablet        | Bottle 60 units       | 20 mg                | 1.2000      | 60.000           |             |
| Paroxetine     | N06AB05       | 20 mg    | Oral drops                | Bottle 1 unit 30 ml   | 10 mg/ml             | 0.3000      | 15.000           |             |
| Pirlindole     |               | 200 mg   | Tablet                    | Blister 60 units      | 100 mg               | 6.0000      | 30.000           |             |
| Pirlindole     |               | 200 mg   | Tablet                    | Blister 60 units      | 75 mg                | 4.5000      | 22.500           |             |
| Pirlindole     |               | 200 mg   | Tablet                    | Bottle 20 units       | 50 mg                | 1.0000      | 5.000            |             |
| Pirlindole     |               | 200 mg   | Tablet                    | Blister 60 units      | 50 mg                | 3.0000      | 15.000           |             |
| Reboxetine     | N06AX18       | 8 mg     | Tablet                    | Blister 20 units      | 4 mg                 | 0.0800      | 10.000           |             |
| Reboxetine     | N06AX18       | 8 mg     | Tablet                    | Blister 60 units      | 4 mg                 | 0.2400      | 30.000           |             |
| Sertraline     | N06AB06       | 50 mg    | Film-coated tablet        | Blister 10 units      | 50 mg                | 0.5000      | 10.000           |             |
| Sertraline     | N06AB06       | 50 mg    | Film-coated tablet        | Blister 14 units      | 50 mg                | 0.7000      | 14.000           |             |
| Sertraline     | N06AB06       | 50 mg    | Film-coated tablet        | Blister 20 units      | 50 mg                | 1.0000      | 20.000           |             |
| Sertraline     | N06AB06       | 50 mg    | Film-coated tablet        | Blister 30 units      | 100 mg               | 3.0000      | 60.000           |             |
| Sertraline     | N06AB06       | 50 mg    | Film-coated tablet        | Blister 30 units      | 50 mg                | 1.5000      | 30.000           |             |
| Sertraline     | N06AB06       | 50 mg    | Film-coated tablet        | Blister 56 units      | 100 mg               | 5.6000      | 112.000          |             |
| Sertraline     | N06AB06       | 50 mg    | Film-coated tablet        | Blister 56 units      | 50 mg                | 2.8000      | 56.000           |             |
| Sertraline     | N06AB06       | 50 mg    | Film-coated tablet        | Blister 60 units      | 100 mg               | 6.0000      | 120.000          |             |
| Sertraline     | N06AB06       | 50 mg    | Film-coated tablet        | Blister 60 units      | 150 mg               | 9.0000      | 180.000          |             |
| Sertraline     | N06AB06       | 50 mg    | Film-coated tablet        | Blister 60 units      | 200 mg               | 12.0000     | 240.000          |             |
| Sertraline     | N06AB06       | 50 mg    | Film-coated tablet        | Blister 60 units      | 50 mg                | 3.0000      | 60.000           |             |
| Sertraline     | N06AB06       | 50 mg    | Oral solution concentrate | Bottle 1 unit 60 ml   | 20 mg/ml             | 1.2000      | 24.000           |             |
| Trazodone      | N06AX05       | 300 mg   | Tablet                    | Blister 20 units      | 100 mg               | 2.0000      | 6.667            |             |
| Trazodone      | N06AX05       | 300 mg   | Tablet                    | Blister 20 units      | 150 mg               | 3.0000      | 10.000           |             |
| Trazodone      | N06AX05       | 300 mg   | Tablet                    | Blister 60 units      | 100 mg               | 6.0000      | 20.000           |             |
| Trazodone      | N06AX05       | 300 mg   | Tablet                    | Blister 60 units      | 150 mg               | 9.0000      | 30.000           |             |
| Trazodone      | N06AX05       | 300 mg   | Modified-release tablet   | Blister 20 units      | 150 mg               | 3.0000      | 10.000           |             |
| Trazodone      | N06AX05       | 300 mg   | Modified-release tablet   | Blister 60 units      | 150 mg               | 9.0000      | 30.000           |             |
| Trazodone      | N06AX05       | 300 mg   | Extended-release tablet   | Blister 10 units      | 150 mg               | 1.5000      | 5.000            |             |
| Trazodone      | N06AX05       | 300 mg   | Extended-release tablet   | Blister 30 units      | 300 mg               | 9.0000      | 30.000           |             |
| Trazodone      | N06AX05       | 300 mg   | Film-coated tablet        | Blister 20 units      | 100 mg               | 2.0000      | 6.667            |             |
| Trazodone      | N06AX05       | 300 mg   | Film-coated tablet        | Blister 60 units      | 100 mg               | 6.0000      | 20.000           |             |
| Trimipramine   | N06AA06       | 150 mg   | Tablet                    | Blister 10 units      | 25 mg                | 0.2500      | 1.667            |             |
| Trimipramine   | N06AA06       | 150 mg   | Tablet                    | Blister 60 units      | 25 mg                | 1.5000      | 10.000           |             |
| Trimipramine   | N06AA06       | 150 mg   | Coated tablet             | Blister 60 units      | 100 mg               | 6.0000      | 40.000           |             |
| Venlafaxine    | N06AX16       | 100 mg   | Extended-release capsule  | Blister 10 units      | 37.5 mg              | 0.3750      | 3.750            |             |
| Venlafaxine    | N06AX16       | 100 mg   | Extended-release capsule  | Blister 10 units      | 75 mg                | 0.7500      | 7.500            |             |
| Venlafaxine    | N06AX16       | 100 mg   | Extended-release capsule  | Blister 20 units      | 37.5 mg              | 0.7500      | 7.500            |             |
| Venlafaxine    | N06AX16       | 100 mg   | Extended-release capsule  | Blister 30 units      | 150 mg               | 4.5000      | 45.000           |             |
| Venlafaxine    | N06AX16       | 100 mg   | Extended-release capsule  | Blister 30 units      | 225 mg               | 6.7500      | 67.500           |             |
| Venlafaxine    | N06AX16       | 100 mg   | Extended-release capsule  | Blister 30 units      | 37.5 mg              | 1.1250      | 11.250           |             |
| Venlafaxine    | N06AX16       | 100 mg   | Extended-release capsule  | Blister 30 units      | 75 mg                | 2.2500      | 22.500           |             |
| Venlafaxine    | N06AX16       | 100 mg   | Extended-release tablet   | Blister 10 units      | 37.5 mg              | 0.3750      | 3.750            |             |
| Venlafaxine    | N06AX16       | 100 mg   | Extended-release tablet   | Blister 10 units      | 75 mg                | 0.7500      | 7.500            |             |
| Venlafaxine    | N06AX16       | 100 mg   | Extended-release tablet   | Blister 30 units      | 150 mg               | 4.5000      | 45.000           |             |
| Venlafaxine    | N06AX16       | 100 mg   | Extended-release tablet   | Blister 30 units      | 225 mg               | 6.7500      | 67.500           |             |
| Venlafaxine    | N06AX16       | 100 mg   | Extended-release tablet   | Blister 30 units      | 37.5 mg              | 1.1250      | 11.250           |             |
| Venlafaxine    | N06AX16       | 100 mg   | Extended-release tablet   | Blister 30 units      | 75 mg                | 2.2500      | 22.500           |             |
| Venlafaxine    | N06AX16       | 100 mg   | Film-coated tablet        | Blister 10 units      | 37.5 mg              | 0.3750      | 3.750            |             |
| Venlafaxine    | N06AX16       | 100 mg   | Film-coated tablet        | Blister 20 units      | 37.5 mg              | 0.7500      | 7.500            |             |
| Venlafaxine    | N06AX16       | 100 mg   | Film-coated tablet        | Blister 60 units      | 75 mg                | 4.5000      | 45.000           |             |
| Venlafaxine    | N06AX16       | 100 mg   | Film-coated tablet        | Bottle 1 unit 60 ml   | 75 mg/ml             | 4.5000      | 45.000           |             |
| Vortioxetine   | N06AX26       | 10 mg    | Film-coated tablet        | Blister 14 units      | 5 mg                 | 0.0700      | 7.000            |             |
| Vortioxetine   | N06AX26       | 10 mg    | Film-coated tablet        | Blister 28 units      | 10 mg                | 0.2800      | 28.000           |             |
| Vortioxetine   | N06AX26       | 10 mg    | Film-coated tablet        | Blister 28 units      | 15 mg                | 0.4200      | 42.000           |             |
| Vortioxetine   | N06AX26       | 10 mg    | Film-coated tablet        | Blister 28 units      | 50 mg                | 0.5600      | 56.000           |             |
| Vortioxetine   | N06AX26       | 10 mg    | Film-coated tablet        | Blister 28 units      | 5 mg                 | 0.1400      | 14.000           |             |
| Vortioxetine   | N06AX26       | 10 mg    | Oral drops                | Bottle 1 unit 15 ml   | 20 mg/ml             | 0.3000      | 30.000           |             |

| Drug class    | Drug name       | ATC code | DDD                         | Mode                        | Package type         | Dosage/unit | Total dosage (g) | DDD/package |
|---------------|-----------------|----------|-----------------------------|-----------------------------|----------------------|-------------|------------------|-------------|
| Antipsychotic | Amisulpride     | N05AL05  | 0.4 g                       | Tablet                      | Blister 20 units     | 50 mg       | 1.0000           | 2.500       |
|               | Amisulpride     | N05AL05  | 0.4 g                       | Tablet                      | Blister 60 units     | 200 mg      | 12.0000          | 30.000      |
|               | Amisulpride     | N05AL05  | 0.4 g                       | Tablet                      | Blister 60 units     | 50 mg       | 3.0000           | 7.500       |
|               | Amisulpride     | N05AL05  | 0.4 g                       | Oral solution               | Ampoule 20units 10ml | 50 mg/10 ml | 1.0000           | 2.500       |
|               | Aripiprazole    | N05AX12  | 15 mg                       | Tablet                      | Blister 14 units     | 10 mg       | 0.1400           | 9.333       |
|               | Aripiprazole    | N05AX12  | 15 mg                       | Tablet                      | Blister 14 units     | 15 mg       | 0.2100           | 14.000      |
|               | Aripiprazole    | N05AX12  | 15 mg                       | Tablet                      | Blister 14 units     | 20 mg       | 0.2800           | 18.667      |
|               | Aripiprazole    | N05AX12  | 15 mg                       | Tablet                      | Blister 14 units     | 30 mg       | 0.4200           | 28.000      |
|               | Aripiprazole    | N05AX12  | 15 mg                       | Tablet                      | Blister 14 units     | 5 mg        | 0.0700           | 4.667       |
|               | Aripiprazole    | N05AX12  | 15 mg                       | Tablet                      | Blister 28 units     | 10 mg       | 0.2800           | 18.667      |
|               | Aripiprazole    | N05AX12  | 15 mg                       | Tablet                      | Blister 28 units     | 15 mg       | 0.4200           | 28.000      |
|               | Aripiprazole    | N05AX12  | 15 mg                       | Tablet                      | Blister 28 units     | 20 mg       | 0.5600           | 37.333      |
|               | Aripiprazole    | N05AX12  | 15 mg                       | Tablet                      | Blister 28 units     | 30 mg       | 0.8400           | 56.000      |
|               | Aripiprazole    | N05AX12  | 15 mg                       | Tablet                      | Blister 28 units     | 5 mg        | 0.1400           | 9.333       |
|               | Aripiprazole    | N05AX12  | 15 mg                       | Orodispersible tablet       | Blister 28 units     | 10 mg       | 0.2800           | 18.667      |
|               | Aripiprazole    | N05AX12  | 15 mg                       | Orodispersible tablet       | Blister 28 units     | 15 mg       | 0.4200           | 28.000      |
|               | Aripiprazole    | N05AX12  | 15 mg                       | Extended-release suspension | Vial 1 unit 1.9 ml   | 400 mg      | 0.0000           | 30.080      |
|               | Aripiprazole    | N05AX12  | 15 mg                       | Injectable solution         | Vial 1 unit 1.3 ml   | 7.5 mg/ml   | 0.0000           | 0.650       |
|               | Aripiprazole    | N05AX12  | 15 mg                       | Oral solution               | Bottle 1 unit 150 ml | 1 mg/ml     | 0.1500           | 10.000      |
|               | Cariprazine     | N05AX15  | 3 mg                        | Capsule                     | Blister 14 units     | 1.5 mg      | 0.0210           | 7.000       |
|               | Cariprazine     | N05AX15  | 3 mg                        | Capsule                     | Blister 14 units     | 3 mg        | 0.0420           | 14.000      |
|               | Cariprazine     | N05AX15  | 3 mg                        | Capsule                     | Blister 28 units     | 1.5 mg      | 0.0420           | 14.000      |
|               | Cariprazine     | N05AX15  | 3 mg                        | Capsule                     | Blister 28 units     | 3 mg        | 0.0840           | 28.000      |
|               | Cariprazine     | N05AX15  | 3 mg                        | Capsule                     | Blister 28 units     | 4.5 mg      | 0.1260           | 42.000      |
|               | Cariprazine     | N05AX15  | 3 mg                        | Capsule                     | Blister 28 units     | 6 mg        | 0.1680           | 56.000      |
|               | Chlorpromazine  | N05AA01  | 300 mg                      | Coated tablet               | Blister 20 units     | 25 mg       | 0.5000           | 1.667       |
|               | Chlorpromazine  | N05AA01  | 300 mg                      | Coated tablet               | Blister 60 units     | 100 mg      | 6.0000           | 20.000      |
|               | Chlorpromazine  | N05AA01  | 300 mg                      | Coated tablet               | Blister 60 units     | 25 mg       | 1.5000           | 5.000       |
|               | Chlorpromazine  | N05AA01  | 300 mg                      | Oral drops                  | Dropper 1 unit 30 ml | 40 mg/ml    | 12.0000          | 38.667      |
|               | Chlorpromazine  | N05AA01  | 300 mg                      | Injectable solution         | Ampoule 5 units 2 ml | 50 mg/2 ml  | 0.2500           | 2.500       |
|               | Chlorpromazine  | N05AA01  | 300 mg                      | Injectable solution         | Ampoule 6 units 5 ml | 25 mg/5 ml  | 0.1500           | 1.500       |
|               | Ciamemazine     | N05AA06  | 100 mg                      | Coated tablet               | Blister 20 units     | 100 mg      | 2.0000           | 20.000      |
|               | Ciamemazine     | N05AA06  | 100 mg                      | Coated tablet               | Blister 60 units     | 100 mg      | 6.0000           | 60.000      |
|               | Ciamemazine     | N05AA06  | 100 mg                      | Oral drops                  | Bottle 1 unit 30 ml  | 40 mg/ml    | 1.2000           | 12.000      |
|               | Clozapine       | N05AH02  | 300 mg                      | Tablet                      | Blister 14 units     | 25 mg       | 1.5000           | 1.667       |
|               | Clozapine       | N05AH02  | 300 mg                      | Tablet                      | Blister 20 units     | 25 mg       | 0.5000           | 1.667       |
|               | Clozapine       | N05AH02  | 300 mg                      | Tablet                      | Blister 56 units     | 25 mg       | 1.4000           | 4.667       |
|               | Clozapine       | N05AH02  | 300 mg                      | Tablet                      | Blister 60 units     | 100 mg      | 6.0000           | 20.000      |
|               | Clozapine       | N05AH02  | 300 mg                      | Tablet                      | Blister 60 units     | 25 mg       | 1.5000           | 5.000       |
|               | Flufenazine     | N05AB02  | 4 mg                        | Injectable solution         | Ampoule 1 unit 1 ml  | 25 mg/ml    | 0.0250           | 25.000      |
|               | Flupentixol     | N05AP01  | 4 mg                        | Injectable solution         | Ampoule 1 unit 1 ml  | 100 mg/1 ml | 0.0000           | 1.000       |
|               | Flupentixol     | N05AP01  | 4 mg                        | Injectable solution         | Ampoule 5 units 1 ml | 20 mg/1 ml  | 0.1000           | 25.000      |
|               | Haloperidol     | N05AD01  | 8 mg                        | Tablet                      | Blister 20 units     | 1 mg        | 0.0200           | 2.500       |
|               | Haloperidol     | N05AD01  | 8 mg                        | Tablet                      | Blister 60 units     | 10 mg       | 0.6000           | 75.000      |
|               | Haloperidol     | N05AD01  | 8 mg                        | Tablet                      | Blister 60 units     | 1 mg        | 0.0600           | 7.500       |
|               | Haloperidol     | N05AD01  | 8 mg                        | Tablet                      | Blister 60 units     | 2 mg        | 0.1200           | 15.000      |
|               | Haloperidol     | N05AD01  | 8 mg                        | Tablet                      | Blister 60 units     | 5 mg        | 0.3000           | 37.500      |
|               | Haloperidol     | N05AD01  | 8 mg                        | Injectable solution         | Ampoule 1 unit 1 ml  | 100 mg/1 ml | 0.1000           | 30.300      |
|               | Haloperidol     | N05AD01  | 8 mg                        | Injectable solution         | Ampoule 1 unit 1 ml  | 50 mg/1 ml  | 0.0500           | 15.150      |
|               | Haloperidol     | N05AD01  | 8 mg                        | Injectable solution         | Ampoule 5 units 1 ml | 5 mg/1 ml   | 0.0250           | 3.125       |
|               | Haloperidol     | N05AD01  | 8 mg                        | Oral solution               | Bottle 1 unit 30 ml  | 2 mg/ml     | 0.0600           | 7.500       |
|               | Levomepromazine | N05AA02  | 300 mg                      | Coated tablet               | Blister 20 units     | 25 mg       | 0.6000           | 20.000      |
|               | Levomepromazine | N05AA02  | 300 mg                      | Coated tablet               | Blister 60 units     | 100 mg      | 6.0000           | 20.000      |
|               | Levomepromazine | N05AA02  | 300 mg                      | Coated tablet               | Blister 60 units     | 25 mg       | 1.5000           | 5.000       |
|               | Levomepromazine | N05AA02  | 300 mg                      | Oral drops                  | Bottle 1 unit 30 ml  | 40 mg/ml    | 1.2000           | 4.000       |
|               | Levomepromazine | N05AA02  | 300 mg                      | Injectable solution         | Ampoule 6 units 1 ml | 25 mg/1 ml  | 0.1500           | 1.500       |
|               | Melperone       | N05AD03  | 300 mg                      | Film-coated tablet          | Bottle 20 units      | 25 mg       | 0.5000           | 1.667       |
|               | Melperone       | N05AD03  | 300 mg                      | Film-coated tablet          | Bottle 60 units      | 25 mg       | 1.5000           | 5.000       |
|               | Melperone       | N05AD03  | 300 mg                      | Film-coated tablet          | Bottle 60 units      | 50 mg       | 3.0000           | 10.000      |
|               | Olanzapine      | N05AH03  | 10 mg                       | Tablet                      | Blister 14 units     | 2.5 mg      | 0.0350           | 5.000       |
|               | Olanzapine      | N05AH03  | 10 mg                       | Tablet                      | Blister 28 units     | 10 mg       | 0.2800           | 28.000      |
|               | Olanzapine      | N05AH03  | 10 mg                       | Tablet                      | Blister 28 units     | 15 mg       | 0.4200           | 42.000      |
|               | Olanzapine      | N05AH03  | 10 mg                       | Tablet                      | Blister 28 units     | 2.5 mg      | 0.0700           | 7.000       |
|               | Olanzapine      | N05AH03  | 10 mg                       | Tablet                      | Blister 28 units     | 5 mg        | 0.1400           | 14.000      |
|               | Olanzapine      | N05AH03  | 10 mg                       | Tablet                      | Blister 28 units     | 7.5 mg      | 0.2100           | 21.000      |
|               | Olanzapine      | N05AH03  | 10 mg                       | Orodispersible tablet       | Blister 28 units     | 10 mg       | 0.2800           | 28.000      |
|               | Olanzapine      | N05AH03  | 10 mg                       | Orodispersible tablet       | Blister 28 units     | 15 mg       | 0.4200           | 42.000      |
|               | Olanzapine      | N05AH03  | 10 mg                       | Orodispersible tablet       | Blister 28 units     | 20 mg       | 0.5600           | 56.000      |
|               | Olanzapine      | N05AH03  | 10 mg                       | Orodispersible tablet       | Blister 28 units     | 5 mg        | 0.1400           | 14.000      |
|               | Olanzapine      | N05AH03  | 10 mg                       | Coated tablet               | Blister 28 units     | 10 mg       | 0.2800           | 28.000      |
|               | Olanzapine      | N05AH03  | 10 mg                       | Coated tablet               | Blister 28 units     | 15 mg       | 0.4200           | 42.000      |
|               | Olanzapine      | N05AH03  | 10 mg                       | Coated tablet               | Blister 28 units     | 2.5 mg      | 0.0700           | 7.000       |
|               | Olanzapine      | N05AH03  | 10 mg                       | Coated tablet               | Blister 28 units     | 5 mg        | 0.1400           | 14.000      |
|               | Olanzapine      | N05AH03  | 10 mg                       | Coated tablet               | Blister 28 units     | 7.5 mg      | 0.2100           | 21.000      |
|               | Olanzapine      | N05AH03  | 10 mg                       | Film-coated tablet          | Blister 14 units     | 5 mg        | 0.0700           | 7.000       |
|               | Olanzapine      | N05AH03  | 10 mg                       | Film-coated tablet          | Blister 28 units     | 10 mg       | 0.2800           | 28.000      |
|               | Olanzapine      | N05AH03  | 10 mg                       | Film-coated tablet          | Blister 28 units     | 15 mg       | 0.4200           | 42.000      |
|               | Olanzapine      | N05AH03  | 10 mg                       | Film-coated tablet          | Blister 28 units     | 2.5 mg      | 0.0700           | 7.000       |
|               | Olanzapine      | N05AH03  | 10 mg                       | Film-coated tablet          | Blister 28 units     | 5 mg        | 0.1400           | 14.000      |
|               | Olanzapine      | N05AH03  | 10 mg                       | Film-coated tablet          | Blister 28 units     | 7.5 mg      | 0.2100           | 21.000      |
|               | Paliperidone    | N05AX13  | 2.5 mg                      | Extended-release tablet     | Blister 14 units     | 3 mg        | 0.0420           | 7.000       |
|               | Paliperidone    | N05AX13  | 2.5 mg                      | Extended-release tablet     | Blister 28 units     | 3 mg        | 0.0840           | 14.000      |
|               | Paliperidone    | N05AX13  | 2.5 mg                      | Extended-release tablet     | Blister 28 units     | 6 mg        | 0.1680           | 28.000      |
|               | Paliperidone    | N05AX13  | 2.5 mg                      | Extended-release tablet     | Blister 28 units     | 9 mg        | 0.2520           | 42.000      |
|               | Paliperidone    | N05AX13  | 2.5 mg                      | Extended-release suspension | Pre-filled syringe   | 100 mg      | 0.1000           | 40.000      |
|               | Paliperidone    | N05AX13  | 2.5 mg                      | Extended-release suspension | Pre-filled syringe   | 150 mg      | 0.1500           | 60.000      |
|               | Paliperidone    | N05AX13  | 2.5 mg                      | Extended-release suspension | Pre-filled syringe   | 50 mg       | 0.0500           | 20.000      |
|               | Paliperidone    | N05AX13  | 2.5 mg                      | Extended-release suspension | Pre-filled syringe   | 75 mg       | 0.0750           | 30.000      |
|               | Paliperidone    | N05AX13  | 2.5 mg                      | Extended-release suspension | Pre-filled syringe   | 75 mg       | 0.0750           | 30.000      |
|               | Paliperidone    | N05AX13  | 2.5 mg                      | Extended-release suspension | Pre-filled syringe   | 175 mg      | 0.0000           | 70.000      |
|               | Paliperidone    | N05AX13  | 2.5 mg                      | Extended-release suspension | Pre-filled syringe   | 263 mg      | 0.0000           | 105.200     |
|               | Paliperidone    | N05AX13  | 2.5 mg                      | Extended-release suspension | Pre-filled syringe   | 350 mg      | 0.0000           | 140.000     |
|               | Paliperidone    | N05AX13  | 2.5 mg                      | Extended-release suspension | Pre-filled syringe   | 100 mg      | 0.1000           | 40.000      |
| Paliperidone  | N05AX13         | 2.5 mg   | Extended-release suspension | Pre-filled syringe          | 525 mg               | 0.0000      | 210.000          |             |
| Pimozide      | N05AG02         | 4 mg     | Tablet                      | Blister 20 units            | 4 mg                 | 0.0800      | 20.000           |             |
| Pimozide      | N05AG02         | 4 mg     | Tablet                      | Blister 60 units            | 4 mg                 | 0.2400      | 60.000           |             |
| Quetiapine    | N05AH04         | 400 mg   | Extended-release tablet     | Blister 10 units            | 200 mg               | 2.0000      | 5.000            |             |
| Quetiapine    | N05AH04         | 400 mg   | Extended-release tablet     | Blister 10 units            | 300 mg               | 3.0000      | 7.500            |             |
| Quetiapine    | N05AH04         | 400 mg   | Extended-release tablet     | Blister 10 units            | 50 mg                | 0.5000      | 1.250            |             |
| Quetiapine    | N05AH04         | 400 mg   | Extended-release tablet     | Blister 40 units            | 150 mg               | 4.5000      | 11.250           |             |
| Quetiapine    | N05AH04         | 400 mg   | Extended-release tablet     | Blister 60 units            | 200 mg               | 12.0000     | 30.000           |             |
| Quetiapine    | N05AH04         | 400 mg   | Extended-release tablet     | Blister 60 units            | 300 mg               | 18.0000     | 45.000           |             |
| Quetiapine    | N05AH04         | 400 mg   | Extended-release tablet     | Blister 60 units            | 400 mg               | 24.0000     | 60.000           |             |
| Quetiapine    | N05AH04         | 400 mg   | Extended-release tablet     | Blister 60 units            | 50 mg                | 3.0000      | 7.500            |             |
| Quetiapine    | N05AH04         | 400 mg   | Extended-release tablet     | Bottle 10 units             | 200 mg               | 2.0000      | 5.000            |             |
| Quetiapine    | N05AH04         | 400 mg   | Film-coated tablet          | Blister 10 units            | 25 mg                | 0.2500      | 0.625            |             |
| Quetiapine    | N05AH04         | 400 mg   | Film-coated tablet          | Blister 10 units            | 25+100+200mg         | 0.6500      | 1.625            |             |
| Quetiapine    | N05AH04         | 400 mg   | Film-coated tablet          | Blister 20 units            | 25 mg                | 0.5000      | 1.250            |             |
| Quetiapine    | N05AH04         | 400 mg   | Film-coated tablet          | Blister 60 units            | 100 mg               | 6.0000      | 15.000           |             |
| Quetiapine    | N05AH04         | 400 mg   | Film-coated tablet          | Blister 60 units            | 150 mg               | 9.0000      | 22.500           |             |
| Quetiapine    | N05AH04         | 400 mg   | Film-coated tablet          | Blister 60 units            | 200 mg               | 12.0000     | 30.000           |             |
| Quetiapine    | N05AH04         | 400 mg   | Film-coated tablet          | Blister 60 units            | 300 mg               | 18.0000     | 45.000           |             |
| Quetiapine    | N05AH04         | 400 mg   | Film-coated tablet          | Blister 60 units            | 400 mg               | 24.0000     | 60.000           |             |
| Quetiapine    | N05AH04         | 400 mg   | Film-coated tablet          | Blister 60 units            | 50 mg                | 3.0000      | 7.500            |             |

| Drug class                    | Drug name                 | ATC code   | DDD                      | Mode                        | Package type         | Dosage/unit      | Total dosage (g) | DDD/package |        |
|-------------------------------|---------------------------|------------|--------------------------|-----------------------------|----------------------|------------------|------------------|-------------|--------|
| Antipsychotic                 | Quetiapine                | N05AH04    | 400 mg                   | Film-coated tablet          | Blister 6 units      | 25 mg            | 0.1500           | 0.375       |        |
|                               | Risperidone               | N05AX08    | 5 mg                     | Orodispersible tablet       | Blister 14 units     | 0.5 mg           | 0.0070           | 1.400       |        |
|                               | Risperidone               | N05AX08    | 5 mg                     | Orodispersible tablet       | Blister 14 units     | 2 mg             | 0.0280           | 5.600       |        |
|                               | Risperidone               | N05AX08    | 5 mg                     | Orodispersible tablet       | Blister 20 units     | 0.5 mg           | 0.0100           | 2.000       |        |
|                               | Risperidone               | N05AX08    | 5 mg                     | Orodispersible tablet       | Blister 20 units     | 1 mg             | 0.0200           | 4.000       |        |
|                               | Risperidone               | N05AX08    | 5 mg                     | Orodispersible tablet       | Blister 28 units     | 2 mg             | 0.0560           | 11.200      |        |
|                               | Risperidone               | N05AX08    | 5 mg                     | Orodispersible tablet       | Blister 56 units     | 0.5 mg           | 0.0280           | 5.600       |        |
|                               | Risperidone               | N05AX08    | 5 mg                     | Orodispersible tablet       | Blister 56 units     | 1 mg             | 0.0560           | 11.200      |        |
|                               | Risperidone               | N05AX08    | 5 mg                     | Orodispersible tablet       | Blister 56 units     | 2 mg             | 0.1120           | 22.400      |        |
|                               | Risperidone               | N05AX08    | 5 mg                     | Orodispersible tablet       | Blister 56 units     | 3 mg             | 0.1680           | 33.600      |        |
|                               | Risperidone               | N05AX08    | 5 mg                     | Orodispersible tablet       | Blister 56 units     | 4 mg             | 0.2240           | 44.800      |        |
|                               | Risperidone               | N05AX08    | 5 mg                     | Orodispersible tablet       | Blister 60 units     | 0.5 mg           | 0.0300           | 6.000       |        |
|                               | Risperidone               | N05AX08    | 5 mg                     | Orodispersible tablet       | Blister 60 units     | 1 mg             | 0.0600           | 12.000      |        |
|                               | Risperidone               | N05AX08    | 5 mg                     | Orodispersible tablet       | Blister 60 units     | 2 mg             | 0.1200           | 24.000      |        |
|                               | Risperidone               | N05AX08    | 5 mg                     | Film-coated tablet          | Blister 20 units     | 0.5 mg           | 0.0100           | 2.000       |        |
|                               | Risperidone               | N05AX08    | 5 mg                     | Film-coated tablet          | Blister 20 units     | 1 mg             | 0.0200           | 4.000       |        |
|                               | Risperidone               | N05AX08    | 5 mg                     | Film-coated tablet          | Blister 20 units     | 0.5 mg           | 0.0300           | 6.000       |        |
|                               | Risperidone               | N05AX08    | 5 mg                     | Film-coated tablet          | Blister 60 units     | 1 mg             | 0.0600           | 12.000      |        |
|                               | Risperidone               | N05AX08    | 5 mg                     | Film-coated tablet          | Blister 60 units     | 2 mg             | 0.1200           | 24.000      |        |
|                               | Risperidone               | N05AX08    | 5 mg                     | Film-coated tablet          | Blister 60 units     | 3 mg             | 0.1800           | 36.000      |        |
|                               | Risperidone               | N05AX08    | 5 mg                     | Film-coated tablet          | Blister 60 units     | 4 mg             | 0.2400           | 48.000      |        |
|                               | Risperidone               | N05AX08    | 5 mg                     | Suspension for injection    | Vial 1 unit 2 ml     | 25 mg/2 ml       | 0.0250           | 9.250       |        |
|                               | Risperidone               | N05AX08    | 5 mg                     | Suspension for injection    | Vial 1 unit 2 ml     | 37.5 mg/2 ml     | 0.0375           | 13.889      |        |
|                               | Risperidone               | N05AX08    | 5 mg                     | Suspension for injection    | Vial 1 unit 2 ml     | 50 mg/2 ml       | 0.0500           | 18.519      |        |
|                               | Risperidone               | N05AX08    | 5 mg                     | Extended-release suspension | Vial 1 unit 2 ml     | 25 mg/2 ml       | 0.0250           | 9.250       |        |
|                               | Risperidone               | N05AX08    | 5 mg                     | Extended-release suspension | Vial 1 unit 2 ml     | 37.5 mg/2 ml     | 0.0375           | 13.889      |        |
|                               | Risperidone               | N05AX08    | 5 mg                     | Extended-release suspension | Vial 1 unit 2 ml     | 50 mg/2 ml       | 0.0500           | 18.519      |        |
|                               | Risperidone               | N05AX08    | 5 mg                     | Extended-release suspension | Pre-filled syringe   | 75mg/0.383ml     | 0.0750           | 27.777      |        |
|                               | Risperidone               | N05AX08    | 5 mg                     | Extended-release suspension | Pre-filled syringe   | 100mg/0.49ml     | 0.1000           | 37.037      |        |
|                               | Risperidone               | N05AX08    | 5 mg                     | Oral solution               | Bottle 1 unit 30 ml  | 1 mg/ml          | 0.0300           | 6.000       |        |
|                               | Sulpiride                 | N05AL01    | 800 mg                   | Capsule                     | Blister 20 units     | 1.0000           | 1.250            | 2.500       |        |
|                               | Sulpiride                 | N05AL01    | 800 mg                   | Capsule                     | Blister 60 units     | 50 mg            | 3.0000           | 3.750       |        |
|                               | Sulpiride                 | N05AL01    | 800 mg                   | Tablet                      | Blister 60 units     | 200 mg           | 12.0000          | 15.000      |        |
|                               | Tapiride                  | N05AL03    | 400 mg                   | Tablet                      | Blister 20 units     | 100 mg           | 2.0000           | 5.000       |        |
|                               | Tapiride                  | N05AL03    | 400 mg                   | Tablet                      | Blister 20 units     | 100 mg           | 6.0000           | 15.000      |        |
|                               | Tapiride                  | N05AL03    | 400 mg                   | Injectable solution         | Ampoule 6 units 2 ml | 100 mg/2 ml      | 0.6000           | 1.500       |        |
|                               | Ziprasidone               | N05AE04    | 80 mg                    | Capsule                     | Blister 14 units     | 20 mg            | 0.2800           | 3.500       |        |
|                               | Ziprasidone               | N05AE04    | 80 mg                    | Capsule                     | Blister 14 units     | 40 mg            | 0.5600           | 7.000       |        |
|                               | Ziprasidone               | N05AE04    | 80 mg                    | Capsule                     | Blister 56 units     | 20 mg            | 1.1200           | 14.000      |        |
|                               | Ziprasidone               | N05AE04    | 80 mg                    | Capsule                     | Blister 56 units     | 40 mg            | 2.2400           | 28.000      |        |
|                               | Ziprasidone               | N05AE04    | 80 mg                    | Capsule                     | Blister 56 units     | 60 mg            | 3.3600           | 42.000      |        |
|                               | Ziprasidone               | N05AE04    | 80 mg                    | Capsule                     | Blister 56 units     | 80 mg            | 4.4800           | 56.000      |        |
|                               | Zotepine                  | N05AX11    | 200 mg                   | Coated tablet               | Blister 20 units     | 25 mg            | 0.5000           | 2.500       |        |
|                               | Zotepine                  | N05AX11    | 200 mg                   | Coated tablet               | Blister 60 units     | 100 mg           | 6.0000           | 30.000      |        |
|                               | Zotepine                  | N05AX11    | 200 mg                   | Coated tablet               | Blister 60 units     | 25 mg            | 1.5000           | 7.500       |        |
|                               | Zotepine                  | N05AX11    | 200 mg                   | Coated tablet               | Blister 60 units     | 50 mg            | 3.0000           | 15.000      |        |
|                               | Zuclophenthixol           | N05AF05    | 30 mg                    | Injectable solution         | Ampoule 1 unit 1 ml  | 200 mg/1 ml      | 0.2000           | 2.000       |        |
|                               | Zuclophenthixol           | N05AF05    | 30 mg                    | Injectable solution         | Ampoule 1 unit 1 ml  | 50 mg/1 ml       | 0.0500           | 1.667       |        |
|                               | Benzodiazepine or similar | Alprazolam | N05BA12                  | 1 mg                        | Tablet               | Blister 20 units | 0.25 mg          | 0.0050      | 5.000  |
|                               |                           | Alprazolam | N05BA12                  | 1 mg                        | Tablet               | Blister 20 units | 0.5 mg           | 0.0100      | 10.000 |
|                               |                           | Alprazolam | N05BA12                  | 1 mg                        | Tablet               | Blister 20 units | 1 mg             | 0.0200      | 20.000 |
|                               |                           | Alprazolam | N05BA12                  | 1 mg                        | Tablet               | Blister 60 units | 0.25 mg          | 0.0150      | 30.000 |
|                               |                           | Alprazolam | N05BA12                  | 1 mg                        | Tablet               | Blister 60 units | 0.5 mg           | 0.0300      | 30.000 |
| Alprazolam                    |                           | N05BA12    | 1 mg                     | Tablet                      | Blister 60 units     | 1 mg             | 0.0600           | 60.000      |        |
| Alprazolam                    |                           | N05BA12    | 1 mg                     | Modified-release tablet     | Blister 20 units     | 0.5 mg           | 0.0100           | 10.000      |        |
| Alprazolam                    |                           | N05BA12    | 1 mg                     | Modified-release tablet     | Blister 20 units     | 1 mg             | 0.0200           | 20.000      |        |
| Alprazolam                    |                           | N05BA12    | 1 mg                     | Modified-release tablet     | Blister 20 units     | 2 mg             | 0.0400           | 40.000      |        |
| Alprazolam                    |                           | N05BA12    | 1 mg                     | Modified-release tablet     | Blister 20 units     | 3 mg             | 0.0600           | 60.000      |        |
| Alprazolam                    |                           | N05BA12    | 1 mg                     | Modified-release tablet     | Blister 40 units     | 0.5 mg           | 0.0200           | 20.000      |        |
| Alprazolam                    |                           | N05BA12    | 1 mg                     | Modified-release tablet     | Blister 40 units     | 1 mg             | 0.0400           | 40.000      |        |
| Alprazolam                    |                           | N05BA12    | 1 mg                     | Modified-release tablet     | Blister 60 units     | 0.5 mg           | 0.0300           | 30.000      |        |
| Alprazolam                    |                           | N05BA12    | 1 mg                     | Modified-release tablet     | Blister 60 units     | 1 mg             | 0.0600           | 60.000      |        |
| Alprazolam                    |                           | N05BA12    | 1 mg                     | Modified-release tablet     | Blister 60 units     | 2 mg             | 0.1200           | 120.000     |        |
| Alprazolam                    |                           | N05BA12    | 1 mg                     | Modified-release tablet     | Blister 60 units     | 3 mg             | 0.1500           | 180.000     |        |
| Alprazolam                    |                           | N05BA12    | 1 mg                     | Sublingual tablet           | Blister 10 units     | 0.5 mg           | 0.0050           | 5.000       |        |
| Alprazolam                    |                           | N05BA12    | 1 mg                     | Sublingual tablet           | Blister 20 units     | 0.5 mg           | 0.0100           | 10.000      |        |
| Alprazolam                    |                           | N05BA12    | 1 mg                     | Sublingual tablet           | Blister 60 units     | 0.5 mg           | 0.0300           | 30.000      |        |
| Alprazolam                    |                           | N05BA12    | 1 mg                     | Sublingual tablet           | Blister 60 units     | 1 mg             | 0.0600           | 60.000      |        |
| Bromazepam                    |                           | N05BA08    | 10 mg                    | Capsule                     | Blister 20 units     | 1.5 mg           | 0.0300           | 3.000       |        |
| Bromazepam                    |                           | N05BA08    | 10 mg                    | Capsule                     | Blister 20 units     | 3 mg             | 0.0600           | 6.000       |        |
| Bromazepam                    |                           | N05BA08    | 10 mg                    | Capsule                     | Blister 60 units     | 1.5 mg           | 0.0900           | 9.000       |        |
| Bromazepam                    |                           | N05BA08    | 10 mg                    | Capsule                     | Blister 60 units     | 3 mg             | 0.1800           | 18.000      |        |
| Bromazepam                    |                           | N05BA08    | 10 mg                    | Tablet                      | Blister 20 units     | 1.5 mg           | 0.0300           | 3.000       |        |
| Bromazepam                    |                           | N05BA08    | 10 mg                    | Tablet                      | Blister 20 units     | 3 mg             | 0.0600           | 6.000       |        |
| Bromazepam                    |                           | N05BA08    | 10 mg                    | Tablet                      | Blister 20 units     | 6 mg             | 0.1200           | 12.000      |        |
| Bromazepam                    |                           | N05BA08    | 10 mg                    | Tablet                      | Blister 40 units     | 1.5 mg           | 0.0600           | 6.000       |        |
| Bromazepam                    |                           | N05BA08    | 10 mg                    | Tablet                      | Blister 40 units     | 3 mg             | 0.1200           | 12.000      |        |
| Bromazepam                    |                           | N05BA08    | 10 mg                    | Tablet                      | Blister 40 units     | 6 mg             | 0.2400           | 24.000      |        |
| Bromazepam                    |                           | N05BA08    | 10 mg                    | Tablet                      | Blister 60 units     | 1.5 mg           | 0.0900           | 9.000       |        |
| Bromazepam                    |                           | N05BA08    | 10 mg                    | Tablet                      | Blister 60 units     | 3 mg             | 0.1800           | 18.000      |        |
| Bromazepam                    |                           | N05BA08    | 10 mg                    | Tablet                      | Blister 60 units     | 6 mg             | 0.3600           | 36.000      |        |
| Brotizolam                    |                           | N05CD09    | 0.25 mg                  | Tablet                      | Blister 14 units     | 0.25 mg          | 0.0035           | 14.000      |        |
| Clobazam                      |                           | N05BA09    | 20 mg                    | Tablet                      | Blister 20 units     | 10 mg            | 0.2000           | 10.000      |        |
| Clobazam                      |                           | N05BA09    | 20 mg                    | Tablet                      | Blister 20 units     | 20 mg            | 0.4000           | 20.000      |        |
| Clobazam                      |                           | N05BA09    | 20 mg                    | Tablet                      | Blister 30 units     | 10 mg            | 0.3000           | 15.000      |        |
| Clobazam                      |                           | N05BA09    | 20 mg                    | Tablet                      | Blister 30 units     | 20 mg            | 0.6000           | 30.000      |        |
| Clorazepate dip.              |                           | N05BA05    | 20 mg                    | Capsule                     | Blister 20 units     | 10 mg            | 0.2000           | 10.000      |        |
| Clorazepate dip.              |                           | N05BA05    | 20 mg                    | Capsule                     | Blister 20 units     | 15 mg            | 0.3000           | 15.000      |        |
| Clorazepate dip.              |                           | N05BA05    | 20 mg                    | Capsule                     | Blister 20 units     | 5 mg             | 0.1000           | 5.000       |        |
| Clorazepate dip.              |                           | N05BA05    | 20 mg                    | Capsule                     | Blister 60 units     | 10 mg            | 0.6000           | 30.000      |        |
| Clorazepate dip.              |                           | N05BA05    | 20 mg                    | Capsule                     | Blister 60 units     | 15 mg            | 0.9000           | 45.000      |        |
| Clorazepate dip.              |                           | N05BA05    | 20 mg                    | Capsule                     | Blister 60 units     | 5 mg             | 0.3000           | 15.000      |        |
| Chlordiazepoxide              |                           | N05BA02    | 30 mg                    | Coated tablet               | Blister 20 units     | 5 mg             | 0.0200           | 2.000       |        |
| Chlordiazepoxide              |                           | N05BA02    | 30 mg                    | Coated tablet               | Blister 60 units     | 10 mg            | 0.6000           | 20.000      |        |
| Chlordiazepoxide              |                           | N05BA02    | 30 mg                    | Coated tablet               | Blister 60 units     | 5 mg             | 0.3000           | 10.000      |        |
| Chlordiazepoxide + cld. brom. |                           | A03CA02    | 30 mg                    | Coated tablet               | Blister 20 units     | 5mg+2.5mg        | 0.1000           | 3.333       |        |
| Chlordiazepoxide + cld. brom. |                           | A03CA02    | 30 mg                    | Coated tablet               | Blister 60 units     | 5mg+2.5mg        | 0.3000           | 10.000      |        |
| Cloazolam                     |                           | N05BA22    | 6 mg                     | Tablet                      | Blister 20 units     | 1 mg             | 0.0200           | 3.333       |        |
| Cloazolam                     |                           | N05BA22    | 6 mg                     | Tablet                      | Blister 20 units     | 2 mg             | 0.0400           | 6.667       |        |
| Cloazolam                     |                           | N05BA22    | 6 mg                     | Tablet                      | Blister 60 units     | 1 mg             | 0.0600           | 10.000      |        |
| Cloazolam                     |                           | N05BA22    | 6 mg                     | Tablet                      | Blister 60 units     | 2 mg             | 0.1200           | 20.000      |        |
| Diazepam                      | N05BA01                   | 10 mg      | Capsule                  | Blister 20 units            | 3 mg                 | 0.0600           | 6.000            |             |        |
| Diazepam                      | N05BA01                   | 10 mg      | Capsule                  | Blister 20 units            | 6 mg                 | 0.1200           | 12.000           |             |        |
| Diazepam                      | N05BA01                   | 10 mg      | Capsule                  | Blister 60 units            | 3 mg                 | 0.1800           | 18.000           |             |        |
| Diazepam                      | N05BA01                   | 10 mg      | Capsule                  | Blister 60 units            | 6 mg                 | 0.3600           | 36.000           |             |        |
| Diazepam                      | N05BA01                   | 10 mg      | Extended-release capsule | Blister 20 units            | 10 mg                | 0.2000           | 20.000           |             |        |
| Diazepam                      | N05BA01                   | 10 mg      | Extended-release capsule | Blister 60 units            | 10 mg                | 0.6000           | 60.000           |             |        |
| Diazepam                      | N05BA01                   | 10 mg      | Tablet                   | Blister 20 units            | 10 mg                | 0.2000           | 20.000           |             |        |
| Diazepam                      | N05BA01                   | 10 mg      | Tablet                   | Blister 20 units            | 5 mg                 | 0.1000           | 10.000           |             |        |
| Diazepam                      | N05BA01                   | 10 mg      | Tablet                   | Blister 25 units            | 10 mg                | 0.2500           | 25.000           |             |        |
| Diazepam                      | N05BA01                   | 10 mg      | Tablet                   | Blister 25 units            | 5 mg                 | 0.1250           | 12.500           |             |        |
| Diazepam                      | N05BA01                   | 10 mg      | Tablet                   | Blister 40 units            | 10 mg                | 0.4000           | 40.000           |             |        |
| Diazepam                      | N05BA01                   | 10 mg      | Tablet                   | Blister 40 units            | 5 mg                 | 0.2000           | 20.000           |             |        |

| Drug class                | Drug name     | ATC code | DDD           | Mode                        | Package type               | Dosage/unit  | Total dosage (g) | DDD/package |
|---------------------------|---------------|----------|---------------|-----------------------------|----------------------------|--------------|------------------|-------------|
| Benzodiazepine or similar | Diazepam      | N05BA01  | 10 mg         | Tablet                      | Blister 60 units           | 10 mg        | 0.6000           | 60.000      |
|                           | Diazepam      | N05BA01  | 10 mg         | Tablet                      | Blister 60 units           | 5 mg         | 0.3000           | 30.000      |
|                           | Diazepam      | N05BA01  | 10 mg         | Rectal solution             | Canula 5 units 2.5 ml      | 10 mg/2.5 ml | 0.0500           | 5.000       |
|                           | Diazepam      | N05BA01  | 10 mg         | Rectal solution             | Canula 5 units 2.5 ml      | 5 mg/2.5 ml  | 0.0250           | 2.500       |
|                           | Diazepam      | N05BA01  | 10 mg         | Rectal solution             | Unid dosage 4 units 2.5 ml | 5 mg/2.5 ml  | 0.0200           | 2.000       |
|                           | Estazolam     | N05CD04  | 3 mg          | Tablet                      | Blister 14 units           | 2 mg         | 0.0280           | 9.333       |
|                           | Estazolam     | N05CD04  | 3 mg          | Tablet                      | Blister 28 units           | 2 mg         | 0.0560           | 18.667      |
|                           | Flurazepam    | N05CD01  | 30 mg         | Capsule                     | Blister 14 units           | 30 mg        | 0.4200           | 14.000      |
|                           | Flurazepam    | N05CD01  | 30 mg         | Capsule                     | Blister 20 units           | 15 mg        | 0.3000           | 10.000      |
|                           | Flurazepam    | N05CD01  | 30 mg         | Capsule                     | Blister 20 units           | 30 mg        | 0.6000           | 20.000      |
|                           | Ketazolam     | N05BA10  | 30 mg         | Capsule                     | Bottle 20 units            | 15 mg        | 0.3000           | 10.000      |
|                           | Ketazolam     | N05BA10  | 30 mg         | Capsule                     | Bottle 20 units            | 30 mg        | 0.6000           | 20.000      |
|                           | Ketazolam     | N05BA10  | 30 mg         | Capsule                     | Bottle 60 units            | 15 mg        | 0.9000           | 30.000      |
|                           | Ketazolam     | N05BA10  | 30 mg         | Capsule                     | Bottle 60 units            | 30 mg        | 1.8000           | 60.000      |
|                           | Loprazolam    | N05CD11  | 1 mg          | Tablet                      | Blister 15 units           | 1 mg         | 0.0150           | 15.000      |
|                           | Lorazepam     | N05BA06  | 2.5 mg        | Tablet                      | Blister 20 units           | 1 mg         | 0.0200           | 8.000       |
|                           | Lorazepam     | N05BA06  | 2.5 mg        | Tablet                      | Blister 20 units           | 2.5 mg       | 0.0500           | 20.000      |
|                           | Lorazepam     | N05BA06  | 2.5 mg        | Tablet                      | Blister 20 units           | 5 mg         | 0.1000           | 40.000      |
|                           | Lorazepam     | N05BA06  | 2.5 mg        | Tablet                      | Blister 30 units           | 1 mg         | 0.0300           | 12.000      |
|                           | Lorazepam     | N05BA06  | 2.5 mg        | Tablet                      | Blister 30 units           | 2.5 mg       | 0.0750           | 30.000      |
|                           | Lorazepam     | N05BA06  | 2.5 mg        | Tablet                      | Blister 40 units           | 1 mg         | 0.0400           | 16.000      |
|                           | Lorazepam     | N05BA06  | 2.5 mg        | Tablet                      | Blister 40 units           | 2.5 mg       | 0.1000           | 40.000      |
|                           | Lorazepam     | N05BA06  | 2.5 mg        | Tablet                      | Blister 60 units           | 1 mg         | 0.0600           | 24.000      |
|                           | Lorazepam     | N05BA06  | 2.5 mg        | Tablet                      | Blister 60 units           | 2.5 mg       | 0.1500           | 60.000      |
|                           | Lorazepam     | N05BA06  | 2.5 mg        | Tablet                      | Blister 60 units           | 5 mg         | 0.3000           | 120.000     |
|                           | Lorazepam     | N05BA06  | 2.5 mg        | Tablet                      | Bottle 20 units            | 5 mg         | 0.1000           | 40.000      |
|                           | Lorazepam     | N05BA06  | 2.5 mg        | Tablet                      | Bottle 60 units            | 5 mg         | 0.3000           | 120.000     |
|                           | Mexazolam     | N05BA25  | 3 mg          | Tablet                      | Blister 20 units           | 1 mg         | 0.0200           | 6.667       |
|                           | Mexazolam     | N05BA25  | 3 mg          | Tablet                      | Blister 60 units           | 1 mg         | 0.0600           | 20.000      |
|                           | Midazolam     | N05CD08  | 15 mg         | Coated tablet               | Blister 14 units           | 15 mg        | 0.2100           | 14.000      |
|                           | Midazolam     | N05CD08  | 15 mg         | Coated tablet               | Blister 20 units           | 15 mg        | 0.3000           | 20.000      |
|                           | Midazolam     | N05CD08  | 15 mg         | Buccal solution             | Pre-filled 4 syringes      | 2.5mg/0.5ml  | 0.0100           | 0.667       |
|                           | Midazolam     | N05CD08  | 15 mg         | Buccal solution             | Buccal solution            | 7.5mg/1.5ml  | 0.0300           | 2.000       |
|                           | Midazolam     | N05CD08  | 15 mg         | Buccal solution             | Pre-filled 4 syringes      | 5 mg/1 ml    | 0.0200           | 1.333       |
|                           | Midazolam     | N05CD08  | 15 mg         | Buccal solution             | Pre-filled 4 syringes      | 10 mg/2 ml   | 0.0400           | 2.667       |
|                           | Oxazepam      | N05BA04  | 50 mg         | Tablet                      | Blister 30 units           | 15 mg        | 0.4500           | 9.000       |
|                           | Oxazepam      | N05BA04  | 50 mg         | Tablet                      | Blister 30 units           | 50 mg        | 1.5000           | 30.000      |
|                           | Prazepam      | N05BA11  | 30 mg         | Tablet                      | Blister 20 units           | 10 mg        | 0.2000           | 6.667       |
|                           | Prazepam      | N05BA11  | 30 mg         | Tablet                      | Blister 60 units           | 10 mg        | 0.6000           | 20.000      |
|                           | Prazepam      | N05CD07  | 20 mg         | Soft capsule                | Blister 14 units           | 20 mg        | 0.2800           | 14.000      |
|                           | Triazolam     | N05CD05  | 0.25 mg       | Tablet                      | Blister 20 units           | 0.25 mg      | 0.0250           | 20.000      |
|                           | Zolpidem      | N05CF02  | 10 mg         | Film-coated tablet          | Blister 14 units           | 10 mg        | 0.1400           | 14.000      |
|                           | Zolpidem      | N05CF02  | 10 mg         | Film-coated tablet          | Blister 14 units           | 10 mg        | 0.1400           | 20.000      |
| Mood stabiliser           | Lamotrigine   | N03AX09  | 300 mg        | Tablet                      | Blister 14 units           | 25 mg        | 0.3500           | 1.167       |
|                           | Lamotrigine   | N03AX09  | 300 mg        | Tablet                      | Blister 14 units           | 50 mg        | 0.7000           | 2.333       |
|                           | Lamotrigine   | N03AX09  | 300 mg        | Tablet                      | Blister 21 units           | 25 mg        | 0.5250           | 1.750       |
|                           | Lamotrigine   | N03AX09  | 300 mg        | Tablet                      | Blister 42 units           | 25 mg        | 1.0500           | 3.500       |
|                           | Lamotrigine   | N03AX09  | 300 mg        | Tablet                      | Blister 42 units           | 50 mg        | 2.1000           | 7.000       |
|                           | Lamotrigine   | N03AX09  | 300 mg        | Tablet                      | Blister 56 units           | 100 mg       | 5.6000           | 18.667      |
|                           | Lamotrigine   | N03AX09  | 300 mg        | Tablet                      | Blister 56 units           | 200 mg       | 11.2000          | 37.333      |
|                           | Lamotrigine   | N03AX09  | 300 mg        | Tablet                      | Blister 56 units           | 25 mg        | 1.4000           | 4.667       |
|                           | Lamotrigine   | N03AX09  | 300 mg        | Tablet                      | Blister 56 units           | 50 mg        | 2.8000           | 9.333       |
|                           | Lamotrigine   | N03AX09  | 300 mg        | Dispersible/chewable tablet | Blister 14 units           | 5 mg         | 0.0700           | 0.233       |
|                           | Lamotrigine   | N03AX09  | 300 mg        | Dispersible/chewable tablet | Blister 56 units           | 25 mg        | 1.4000           | 4.667       |
|                           | Lamotrigine   | N03AX09  | 300 mg        | Dispersible/chewable tablet | Bottle 14 units            | 5 mg         | 0.0700           | 0.233       |
|                           | Lamotrigine   | N03AX09  | 300 mg        | Dispersible/chewable tablet | Bottle 30 units            | 2 mg         | 0.0600           | 0.200       |
|                           | Lithium       | N05AN01  | 24 mmol       | Modified-release tablet     | Blister 100 units          | 400 mg       | 40.0000          | 45.133      |
|                           | Lithium       | N05AN01  | 24 mmol       | Modified-release tablet     | Bottle 100 units           | 400 mg       | 40.0000          | 45.133      |
|                           | Valproic acid | N03AG01  | 1500 mg       | Modified-release tablet     | Blister 20 units           | 300 mg       | 6.0000           | 4.000       |
|                           | Valproic acid | N03AG01  | 1500 mg       | Modified-release tablet     | Blister 60 units           | 300 mg       | 18.0000          | 12.000      |
|                           | Valproic acid | N03AG01  | 1500 mg       | Modified-release tablet     | Blister 60 units           | 500 mg       | 30.0000          | 20.000      |
|                           | Valproic acid | N03AG01  | 1500 mg       | Gastro-resistant capsule    | Blister 60 units           | 500 mg       | 30.0000          | 20.000      |
|                           | Valproic acid | N03AG01  | 1500 mg       | Coated tablet               | Blister 20 units           | 200 mg       | 4.0000           | 2.667       |
|                           | Valproic acid | N03AG01  | 1500 mg       | Coated tablet               | Blister 60 units           | 200 mg       | 12.0000          | 8.000       |
|                           | Valproic acid | N03AG01  | 1500 mg       | Extended-release capsule    | Tablet 50 units            | 150 mg       | 7.5000           | 5.000       |
|                           | Valproic acid | N03AG01  | 1500 mg       | Extended-release capsule    | Tablet 50 units            | 300 mg       | 15.0000          | 10.000      |
|                           | Valproic acid | N03AG01  | 1500 mg       | Modified-release granules   | Sachet 30 units            | 100 mg       | 3.0000           | 2.000       |
|                           | Valproic acid | N03AG01  | 1500 mg       | Modified-release granules   | Sachet 30 units            | 1000 mg      | 30.0000          | 20.000      |
|                           | Valproic acid | N03AG01  | 1500 mg       | Modified-release granules   | Sachet 30 units            | 250 mg       | 7.5000           | 5.000       |
|                           | Valproic acid | N03AG01  | 1500 mg       | Modified-release granules   | Sachet 30 units            | 500 mg       | 15.0000          | 10.000      |
|                           | Valproic acid | N03AG01  | 1500 mg       | Modified-release granules   | Sachet 30 units            | 750 mg       | 22.5000          | 15.000      |
|                           | Valproic acid | N03AG01  | 1500 mg       | Extended-release granules   | Sachet 50 units            | 1000 mg      | 50.0000          | 33.333      |
|                           | Valproic acid | N03AG01  | 1500 mg       | Extended-release granules   | Sachet 50 units            | 500 mg       | 25.0000          | 16.667      |
| Valproic acid             | N03AG01       | 1500 mg  | Oral solution | Bottle 1x 50 ml             | 200 mg/ml                  | 10.0000      | 6.667            |             |
| Valproic acid             | N03AG01       | 1500 mg  | Syrup         | Bottle 1x 200 ml            | 40 mg/ml                   | 8.0000       | 5.333            |             |
| Others                    | Pregabalin    | N02BF02  | 300 mg        | Capsule                     | Blister 14 units           | 25 mg        | 0.3500           | 1.167       |
|                           | Pregabalin    | N02BF02  | 300 mg        | Capsule                     | Blister 14 units           | 75 mg        | 1.0500           | 3.500       |
|                           | Pregabalin    | N02BF02  | 300 mg        | Capsule                     | Blister 56 units           | 150 mg       | 8.4000           | 28.000      |
|                           | Pregabalin    | N02BF02  | 300 mg        | Capsule                     | Blister 56 units           | 225 mg       | 12.6000          | 42.000      |
|                           | Pregabalin    | N02BF02  | 300 mg        | Capsule                     | Blister 56 units           | 25 mg        | 1.4000           | 4.667       |
|                           | Pregabalin    | N02BF02  | 300 mg        | Capsule                     | Blister 56 units           | 300 mg       | 16.8000          | 56.000      |
|                           | Pregabalin    | N02BF02  | 300 mg        | Capsule                     | Blister 56 units           | 50 mg        | 2.8000           | 9.333       |
|                           | Pregabalin    | N02BF02  | 300 mg        | Capsule                     | Blister 56 units           | 75 mg        | 4.2000           | 14.000      |
|                           | Pregabalin    | N02BF02  | 300 mg        | Capsule                     | Blister 84 units           | 100 mg       | 5.6000           | 18.667      |
|                           | Pregabalin    | N02BF02  | 300 mg        | Capsule                     | Blister 84 units           | 200 mg       | 11.2000          | 37.333      |
